# Supplementary material for: miR-101, miR-548b, miR-554, and miR-1202 are reliable prognosis predictors of the miRNAs associated with cancer immunity in primary central nervous system lymphoma
Source: PubMed Central journal article supplement (PMC7043771; doi:10.1371/journal.pone.0229577), 2020-02-26
Supplement: pone.0229577.s001.pdf [file pone.0229577.s001.pdf]

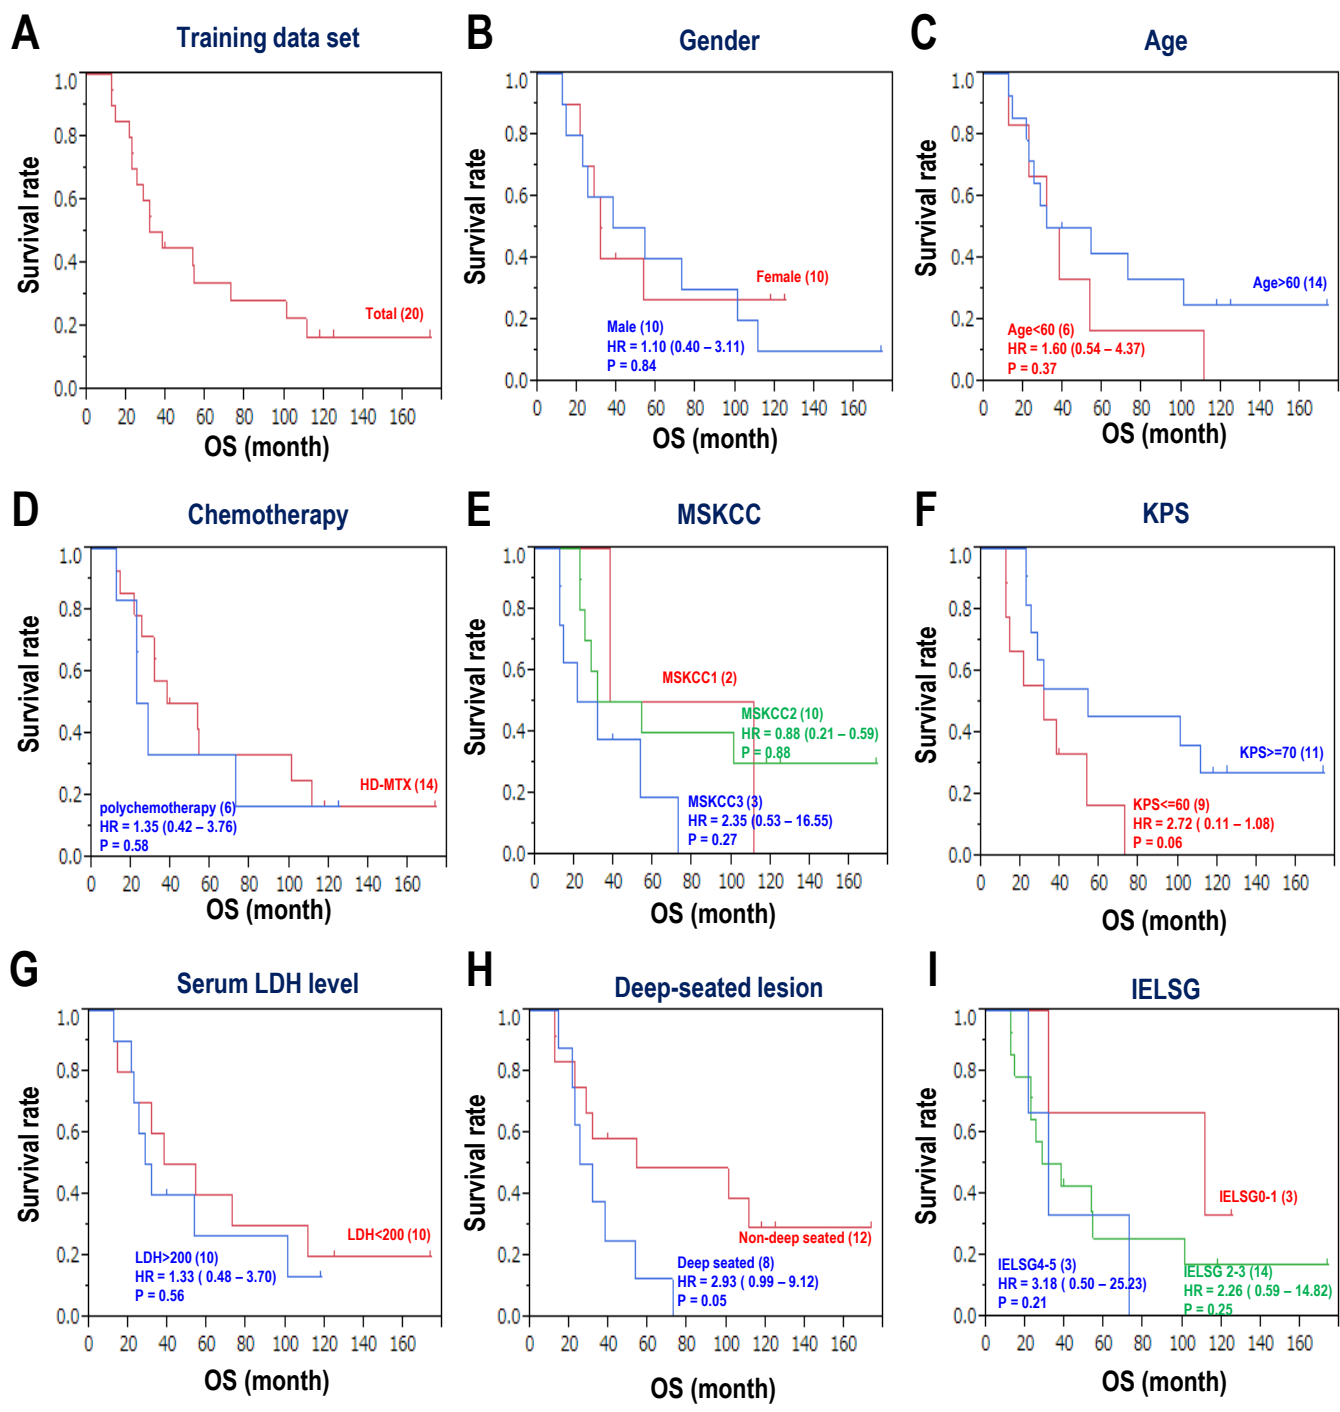

S1 Fig. Survival distribution in PCNSL. (A) Total samples in the training data set. (B) Gender. (C) Diagnosis age. (D) Chemotherapy by HD-MTX or polychemotherapy. (E) MSKCC score. (F) KPS. (G) Serum LDH level. (H) Deep-seated lesion. (I) IELSG. HR; hazard ratio, OS; overall survival.
