# Supplementary material for: miR-101, miR-548b, miR-554, and miR-1202 are reliable prognosis predictors of the miRNAs associated with cancer immunity in primary central nervous system lymphoma
Source: PubMed Central journal article supplement (PMC7043771; doi:10.1371/journal.pone.0229577), 2020-02-26
Supplement: pone.0229577.s002.pdf [file pone.0229577.s002.pdf]

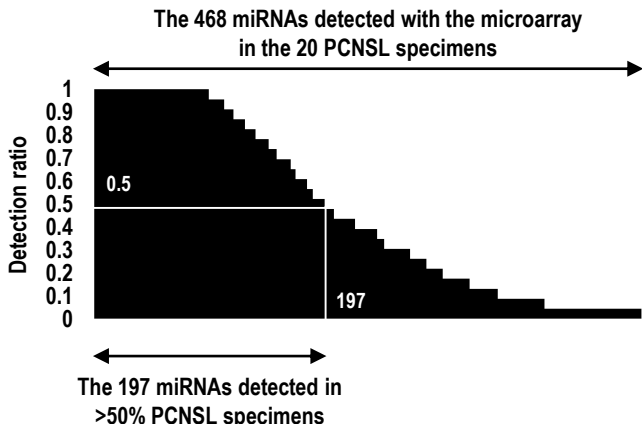

**S2 Fig.** Expression ratio of miRNAs detected with the microarray in PCNSL. 468 miRNAs were detected in the 20 PCNSL specimens. 197 miRNAs were detectable in more than 50% of PCNSL specimens. The expression level over and under the median expression of each miRNA is referred as “expressed” and “not expressed”, respectively.
