# Supplementary material for: miR-101, miR-548b, miR-554, and miR-1202 are reliable prognosis predictors of the miRNAs associated with cancer immunity in primary central nervous system lymphoma
Source: PubMed Central journal article supplement (PMC7043771; doi:10.1371/journal.pone.0229577), 2020-02-26
Supplement: pone.0229577.s003.pdf [file pone.0229577.s003.pdf]

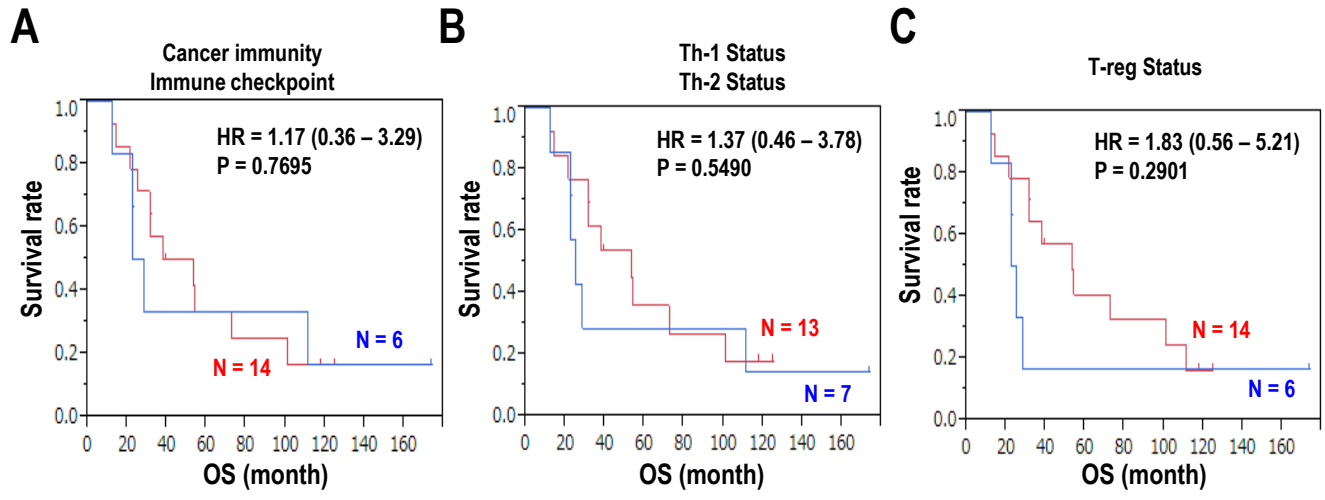

**S3 Fig.** Kaplan-Meier analysis based on the hierarchical cluster method for the expression of miRNAs in 20 PCNSL patients. (A) Cancer immunity and immune checkpoint (stimulatory and inhibitory checkpoints). (B) Th-1 or Th-2 helper T-cell status. (C) T-reg status. HR; hazard ratio, overall survival; OS.
