# Supplementary material for: miR-101, miR-548b, miR-554, and miR-1202 are reliable prognosis predictors of the miRNAs associated with cancer immunity in primary central nervous system lymphoma
Source: PubMed Central journal article supplement (PMC7043771; doi:10.1371/journal.pone.0229577), 2020-02-26
Supplement: pone.0229577.s004.pdf [file pone.0229577.s004.pdf]

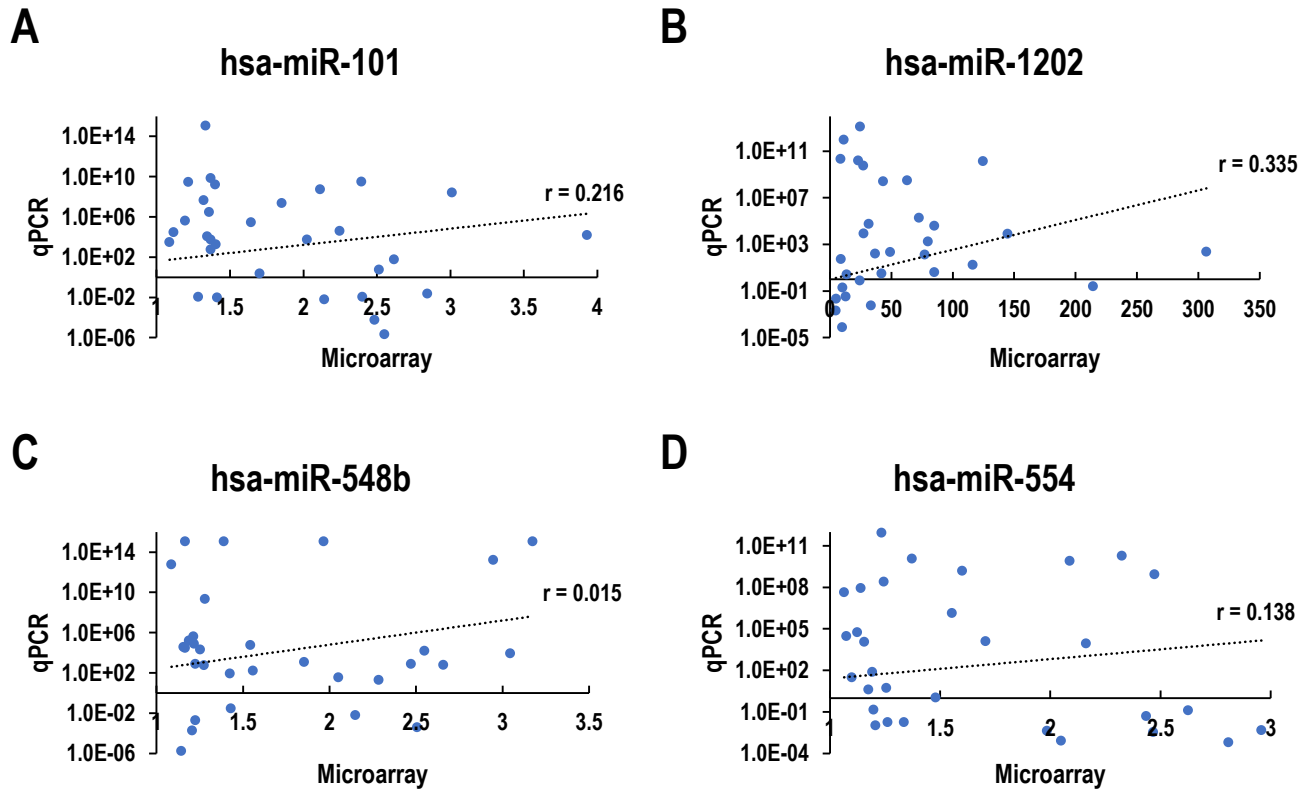

**S4 Fig.** The correlation of the expression of the representative miRNAs between the microarray and the qPCR. (A) hsa-miR-101, (B) hsa-miR-1202, (C) hsa-miR-548b, and (D) hsa-miR-554. Scatter plots were shown with statistic results. Blue dot represents a value in the PCNSL specimen. Dotted lines indicate regression lines with correlation coefficient ( $r$ ).
