# Supplementary material for: miR-101, miR-548b, miR-554, and miR-1202 are reliable prognosis predictors of the miRNAs associated with cancer immunity in primary central nervous system lymphoma
Source: PubMed Central journal article supplement (PMC7043771; doi:10.1371/journal.pone.0229577), 2020-02-26
Supplement: pone.0229577.s005.pdf [file pone.0229577.s005.pdf]

S1 Table. Statistics of patients with PCNSL.

|                              |                     | Training data set | Test data set |
|------------------------------|---------------------|-------------------|---------------|
| number (%)                   |                     | 20 (100)          | 20 (100)      |
| Age (year-old)               | average             | 64.05             | 65.2          |
|                              | median              | 64.5              | 69            |
|                              | min                 | 44                | 23            |
|                              | max                 | 76                | 86            |
| Age>60                       |                     | 14 (70)           | 14 (70)       |
| Age<60                       |                     | 6 (30)            | 6 (30)        |
| Gender                       | Female              | 10 (50)           | 7 (35)        |
|                              | Male                | 10 (50)           | 13 (65)       |
| OS <sup>1</sup> (months)     | average             | 55.31             | 22.14         |
|                              | median              | 34.85             | 21.2          |
|                              | min                 | 12                | 2             |
|                              | max                 | 173.5             | 49.5          |
| chemotherapy                 | HD-MTX <sup>2</sup> | 14 (70)           | 15 (75)       |
|                              | polychemotherapy    | 6 (30)            | 2 (10)        |
| MSKCC <sup>3</sup>           | MSKCC1              | 2 (10)            | 3 (15)        |
|                              | MSKCC2              | 10 (50)           | 5 (25)        |
|                              | MSKCC3              | 3 (15)            | 12 (60)       |
| KPS <sup>4</sup>             | average             | 68                | 63.5          |
|                              | median              | 70                | 60            |
|                              | min                 | 40                | 40            |
|                              | max                 | 100               | 100           |
| KPS>=70                      |                     | 11 (55)           | 7 (35)        |
| KPS<=60                      |                     | 9 (45)            | 13 (65)       |
| Serum LDH <sup>5</sup> (U/L) | average             | 221.65            | 245.68        |
|                              | median              | 199               | 216           |
|                              | min                 | 152               | 146           |
|                              | max                 | 407               | 767           |
| LDH>=200                     |                     | 10 (50)           | 12 (60)       |
| LDH<200                      |                     | 10 (50)           | 7 (35)        |
| Deep seated lesion           | Deep seated         | 8 (40)            | 13 (65)       |
|                              | Non-deep seated     | 12 (60)           | 7 (35)        |
| IELSG <sup>6</sup>           | IELSG0-1            | 3 (15)            | 3 (15)        |
|                              | IELSG2-3            | 14 (70)           | 10 (50)       |
|                              | IELSG4-5            | 3 (15)            | 7 (35)        |

Note: <sup>1</sup>OS; overall survival, <sup>2</sup>HD-MTX; high-dose methotrexate, <sup>3</sup>MSKCC, Memorial Sloan-Kettering Cancer Center, <sup>4</sup>KPS; Karnofsky performance status, <sup>5</sup>LDH; lactate dehydrogenase, <sup>6</sup>IELSG; International Extranodal Lymphoma Study Group.
