# Supplementary material for: miR-101, miR-548b, miR-554, and miR-1202 are reliable prognosis predictors of the miRNAs associated with cancer immunity in primary central nervous system lymphoma
Source: PubMed Central journal article supplement (PMC7043771; doi:10.1371/journal.pone.0229577), 2020-02-26
Supplement: pone.0229577.s006.pdf [file pone.0229577.s006.pdf]

## S2 Table. The cancer immunity-related genes.

| Symbol   | GeneBank  | Description                                               | Alias name                                                                | Th-1    | Th-2     | T-reg | Stimulatory | Inhibitory |
|----------|-----------|-----------------------------------------------------------|---------------------------------------------------------------------------|---------|----------|-------|-------------|------------|
| CD28     | NM_006139 | CD28 molecule                                             | Tp44                                                                      | CD28    | CD28     |       | CD28        |            |
| CD3D     | NM_000732 | CD3d molecule                                             | CD3-DELTA, IMD19, T3D                                                     | CD3D    | CD3D     |       |             |            |
| CD3E     | NM_000733 | CD3e molecule                                             | IMD18, T3E, TCRE                                                          | CD3E    | CD3E     |       |             |            |
| CD3G     | NM_000073 | CD3g molecule                                             | CD3-GAMMA, IMD17, T3G                                                     | CD3G    | CD3G     |       |             |            |
| CD4      | NM_000616 | CD4 molecule                                              | CD4mut                                                                    | CD4     | CD4      | CD4   |             |            |
| CD40LG   | NM_000074 | CD40 ligand                                               | CD154, CD40L, HIGM1, IGM, IMD3, T-BAM, TNFSF5, TRAP, gp39, hCD40L         | CD40LG  | CD40LG   |       | CD40LG      |            |
| CSF2     | NM_000758 | colony stimulating factor 2                               | GMCSF                                                                     | CSF2    | CSF2     |       |             |            |
| IFNG     | NM_000619 | interferon gamma                                          | IFG, IFI                                                                  | IFNG    |          | IFNG  |             |            |
| IL12RB2  | NM_001559 | interleukin 12 receptor subunit beta 2                    |                                                                           | IL12RB2 |          |       |             |            |
| IL18R1   | NM_003855 | interleukin 18 receptor 1                                 | CD218a, CDw218a, IL-1Rrp, IL18RA, IL1RRP                                  | IL18R1  | IL18R1   |       |             |            |
| IL2      | NM_000586 | interleukin 2                                             | IL-2, TCGF, lymphokine                                                    | IL2     |          |       |             |            |
| IL3      | NM_000588 | interleukin 3                                             | IL-3, MCGF, MULTI-CSF                                                     | IL3     | IL3      |       |             |            |
| LTA      | NM_000595 | lymphotoxin alpha                                         | LT, TNFB, TNFSF1                                                          | LTA     |          |       |             |            |
| STAT1    | NM_007315 | signal transducer and activator of transcription 1        | CANDF7, IMD31A, IMD31B, IMD31C, ISGF-3, STAT91                            | STAT1   |          |       |             |            |
| STAT4    | NM_003151 | signal transducer and activator of transcription 4        | SLEB11                                                                    | STAT4   |          |       |             |            |
| TBX21    | NM_013351 | T-box 21                                                  | T-PET, T-bet, TBET, TBLYM                                                 | TBX21   |          |       |             |            |
| TNF      | NM_000594 | tumor necrosis factor                                     | DIF, TNF-alpha, TNFA, TNFSF2                                              | TNF     |          |       |             |            |
| GATA3    | NM_002051 | GATA binding protein 3                                    | HDR, HDRS                                                                 |         | GATA3    |       |             |            |
| IL10     | NM_000572 | interleukin 10                                            | CSIF, GVHDS, IL-10, IL10A, TGIF                                           |         | IL10     | IL10  |             |            |
| IL13     | NM_002188 | interleukin 13                                            | IL-13, P600                                                               |         | IL13     |       |             |            |
| IL4      | NM_000589 | interleukin 4                                             | BCGF-1, BCGF1, BSF-1, BSF1, IL-4                                          |         | IL4      | IL4   |             |            |
| IL5      | NM_000879 | interleukin 5                                             | EDF, IL-5, TRF                                                            |         | IL5      |       |             |            |
| IL6      | NM_000600 | interleukin 6                                             | BSF2, HGF, HSF, IFNB2, IL-6                                               |         | IL6      |       |             |            |
| IL9      | NM_000590 | interleukin 9                                             | HP40, IL-9, P40                                                           |         | IL9      |       |             |            |
| STAT6    | NM_003153 | signal transducer and activator of transcription 6        | D12S1644, IL-4-STAT, STAT6B, STAT6C                                       |         | STAT6    |       |             |            |
| TGFB3    | NM_003239 | transforming growth factor beta 3                         | ARVD, ARVD1, RNHF, TGF-beta3, Transforming growth factor, beta 3, LDS5    |         | TGFB3    | TGFB3 |             |            |
| CD163    | NM_004244 | CD163 molecule                                            | CD163, M130, MM130, SCAR1, CD163 molecule                                 |         | CD163    |       |             |            |
| CD274    | NM_014143 | CD274 molecule                                            | B7-H, B7H1, PD-L1, PDCD1L1, PDCD1LG1, PDL1                                |         | CD274    |       |             | CD274      |
| CD8A     | NM_171827 | CD8a molecule                                             | CD8A, CD8, Leu2, MAL, p32, CD8a molecule                                  |         | CD8A     |       |             |            |
| CTLA4    | NM_005214 | cytotoxic T-lymphocyte associated protein 4               | ALPS5, CD, CD152, CELIAC3, CTLA-4, GRD4, GSE, IDDM12                      |         | CTLA4    |       |             | CTLA4      |
| FOXP3    | NM_014009 | forkhead box P3                                           | FOXP3, AIID, DIETER, IPEX, JM2, PIDX, XPID, forkhead box P3               |         | FOXP3    |       |             |            |
| PDCD1    | NM_005018 | programmed cell death 1                                   | CD279, PD-1, PD1, SLEB2, hPD-1, hPD-1, hSLE1                              |         | PDCD1    |       |             | PDCD1      |
| PDCD1LG2 | NM_025239 | programmed cell death 1 ligand 2                          | B7DC, Btdc, CD273, PD-L2, PDCD1L2, PDL2, programmed cell death 1 ligand 2 |         | PDCD1LG2 |       |             | PDCD1LG2   |
| TGFB1    | NM_000660 | transforming growth factor beta 1                         | CED, DPD1, LAP, TGFB, TGFbeta, transforming growth factor beta 1          |         | TGFB1    |       |             |            |
| TGFB2    | NM_003238 | transforming growth factor beta 2                         | LDS4, TGF-beta2, transforming growth factor beta 2, G-TSF                 |         | TGFB2    |       |             |            |
| CD226    | NM_006566 | CD226 molecule                                            |                                                                           |         |          |       | CD226       |            |
| CD27     | NM_001242 | CD27 molecule                                             | S152, S152, LPFS2, T14, TNFRSF7, Tp55                                     |         | CD27     |       |             |            |
| CD276    | NM_025240 | CD276 molecule                                            | 4lg-B7-H3, B7-H3, B7H3, B7RP-2                                            |         | CD276    |       |             | CD276      |
| CD40     | NM_152854 | CD40 molecule                                             |                                                                           |         | CD40     |       |             |            |
| CD70     | NM_001252 | CD70 molecule                                             |                                                                           |         | CD70     |       |             |            |
| CD80     | NM_005191 | CD80 molecule                                             |                                                                           |         | CD80     |       |             | CD80       |
| HHLA2    | NM_007072 | HERV-H LTR-associating 2                                  |                                                                           |         | HHLA2    |       |             |            |
| ICOS     | NM_012092 | inducible T-cell costimulator                             | AILIM, CD278, CVID1                                                       |         | ICOS     |       |             |            |
| IL2RB    | NM_000878 | interleukin 2 receptor subunit beta                       | CD122, IL15RB, P70-75                                                     |         | IL2RB    |       |             |            |
| PVR      | NM_006505 | poliovirus receptor                                       |                                                                           |         | PVR      |       |             | PVR        |
| TMIGD2   | NM_144615 | transmembrane and immunoglobulin domain containing 2      |                                                                           |         | TMIGD2   |       |             |            |
| TNFRSF14 | NM_003820 | TNF receptor superfamily member 14                        |                                                                           |         | TNFRSF14 |       |             | TNFRSF14   |
| TNFRSF18 | NM_004195 | TNF receptor superfamily member 18                        | AITR, CD357, GITR, GITR-D                                                 |         | TNFRSF18 |       |             |            |
| TNFRSF4  | NM_003327 | TNF receptor superfamily member 4                         |                                                                           |         | TNFRSF4  |       |             |            |
| TNFRSF9  | NM_001561 | TNF receptor superfamily member 9                         | 4-1BB, CD137, CDw137, ILA                                                 |         | TNFRSF9  |       |             |            |
| TNFSF14  | NM_003807 | tumor necrosis factor superfamily member 14               |                                                                           |         | TNFSF14  |       |             |            |
| TNFSF18  | NM_005092 | tumor necrosis factor superfamily member 18               |                                                                           |         | TNFSF18  |       |             |            |
| TNFSF4   | NM_003326 | tumor necrosis factor superfamily member 4                | CD134L, CD252, GP34, OX-40L, OX40L, TXGP1                                 |         | TNFSF4   |       |             |            |
| TNFSF9   | NM_003811 | tumor necrosis factor superfamily member 9                |                                                                           |         | TNFSF9   |       |             |            |
| BTLA     | NM_181780 | B and T lymphocyte associated                             | BTLA1, CD272                                                              |         |          |       |             | BTLA       |
| CD160    | NM_007053 | CD160 molecule                                            |                                                                           |         | CD160    |       |             |            |
| CD86     | NM_175862 | CD86 molecule                                             |                                                                           |         | CD86     |       |             |            |
| CD96     | NM_198196 | CD96 molecule                                             |                                                                           |         | CD96     |       |             |            |
| CEACAM1  | NM_001712 | carcinoembryonic antigen related cell adhesion molecule 1 |                                                                           |         | CEACAM1  |       |             |            |
| HAVCR2   | NM_032782 | hepatitis A virus cellular receptor 2                     | CD366, HAVcr-2, KIM-3, TIM3, TIMD-3, TIMD3, Tim-3                         |         | HAVCR2   |       |             |            |
| IDO1     | NM_002164 | indoleamine 2,3-dioxygenase 1                             | IDO, IDO-1, INDO                                                          |         | IDO1     |       |             |            |
| LAG3     | NM_002286 | lymphocyte activating 3                                   | CD223                                                                     |         | LAG3     |       |             |            |
| LGALS3   | NM_002306 | galectin 3                                                |                                                                           |         | LGALS3   |       |             |            |
| LGALS9   | NM_002308 | galectin 9                                                |                                                                           |         | LGALS9   |       |             |            |
| TIGIT    | NM_173799 | T-cell immunoreceptor with Ig and ITIM domains            |                                                                           |         | TIGIT    |       |             |            |
| VTCN1    | NM_024626 | V-set domain containing T cell activation inhibitor 1     |                                                                           |         |          |       |             | VTCN1      |
