# Supplementary material for: miR-101, miR-548b, miR-554, and miR-1202 are reliable prognosis predictors of the miRNAs associated with cancer immunity in primary central nervous system lymphoma
Source: PubMed Central journal article supplement (PMC7043771; doi:10.1371/journal.pone.0229577), 2020-02-26
Supplement: pone.0229577.s007.pdf [file pone.0229577.s007.pdf]

S3 Table. The miRNA-binding candidates to the cancer immunity-related genes.

| miRNA             | Target gene | Position of target region          | Predicted target sequence   | Site type | Context+<br>score | Context++<br>score<br>percentile | Weighted<br>context++<br>score | Conserve<br>d branch<br>length | P <sub>CT</sub> |
|-------------------|-------------|------------------------------------|-----------------------------|-----------|-------------------|----------------------------------|--------------------------------|--------------------------------|-----------------|
| hsa-let-7d-5p     | TNFSF9      | Position 92-99 of TNFSF9 3' UTR    | 5'-UCCCUGCUGCUUUCUCUACCUCA  | 8mer      | -0.67             | 99                               | -0.67                          | 5.414                          | 0.95            |
| hsa-miR-4458      | TNFSF9      | Position 92-99 of TNFSF9 3' UTR    | 5'-UCCCUGCUGCUUUCUCUACCUCA  | 8mer      | -0.66             | 99                               | -0.66                          | 5.414                          | 0.95            |
| hsa-let-7f-5p     | TNFSF9      | Position 92-99 of TNFSF9 3' UTR    | 5'-UCCCUGCUGCUUUCUCUACCUCA  | 8mer      | -0.64             | 99                               | -0.64                          | 5.414                          | 0.95            |
| hsa-let-7g-5p     | TNFSF9      | Position 92-99 of TNFSF9 3' UTR    | 5'-UCCCUGCUGCUUUCUCUACCUCA  | 8mer      | -0.64             | 99                               | -0.64                          | 5.414                          | 0.95            |
| hsa-miR-98-5p     | TNFSF9      | Position 92-99 of TNFSF9 3' UTR    | 5'-UCCCUGCUGCUUUCUCUACCUCA  | 8mer      | -0.64             | 99                               | -0.64                          | 5.414                          | 0.95            |
| hsa-let-7a-5p     | TNFSF9      | Position 92-99 of TNFSF9 3' UTR    | 5'-UCCCUGCUGCUUUCUCUACCUCA  | 8mer      | -0.63             | 99                               | -0.63                          | 5.414                          | 0.95            |
| hsa-let-7b-5p     | TNFSF9      | Position 92-99 of TNFSF9 3' UTR    | 5'-UCCCUGCUGCUUUCUCUACCUCA  | 8mer      | -0.63             | 99                               | -0.63                          | 5.414                          | 0.95            |
| hsa-let-7c-5p     | TNFSF9      | Position 92-99 of TNFSF9 3' UTR    | 5'-UCCCUGCUGCUUUCUCUACCUCA  | 8mer      | -0.63             | 99                               | -0.63                          | 5.414                          | 0.95            |
| hsa-let-7e-5p     | TNFSF9      | Position 92-99 of TNFSF9 3' UTR    | 5'-UCCCUGCUGCUUUCUCUACCUCA  | 8mer      | -0.63             | 99                               | -0.63                          | 5.414                          | 0.95            |
| hsa-let-7i-5p     | TNFSF9      | Position 92-99 of TNFSF9 3' UTR    | 5'-UCCCUGCUGCUUUCUCUACCUCA  | 8mer      | -0.63             | 99                               | -0.63                          | 5.414                          | 0.95            |
| hsa-miR-4500      | TNFSF9      | Position 92-99 of TNFSF9 3' UTR    | 5'-UCCCUGCUGCUUUCUCUACCUCA  | 8mer      | -0.63             | 99                               | -0.63                          | 5.414                          | 0.95            |
| hsa-miR-133a-3p.1 | CSF2        | Position 83-90 of CSF2 3' UTR      | 5'-GAAGCCUUAUCUUGGAGGACCAA  | 8mer      | -0.57             | 99                               | -0.57                          | 1.891                          | < 0.1           |
| hsa-miR-760       | IL6         | Position 283-290 of IL6 3' UTR     | 5'-GAUAUCCUUUUGUUCAGAGCCA   | 8mer      | -0.57             | 99                               | -0.57                          | 1.948                          | N/A             |
| hsa-miR-149-5p    | IL6         | Position 285-292 of IL6 3' UTR     | 5'-AUUCCUUUUGUUCAGAGCCAGA   | 8mer      | -0.55             | 99                               | -0.55                          | 1.808                          | N/A             |
| hsa-miR-141-3p    | STAT4       | Position 237-244 of STAT4 3' UTR   | 5'-ACAACUUUAGAAACCAGUGUUA   | 8mer      | -0.51             | 99                               | -0.51                          | 2.06                           | < 0.1           |
| hsa-miR-200a-3p   | STAT4       | Position 237-244 of STAT4 3' UTR   | 5'-ACAACUUUAGAAACCAGUGUUA   | 8mer      | -0.5              | 99                               | -0.5                           | 2.06                           | < 0.1           |
| hsa-miR-135a-5p   | STAT6       | Position 1100-1107 of STAT6 3' UTR | 5'-GGGGUUAUAGAUCCU-AAGCCAU  | 8mer      | -0.49             | 99                               | -0.49                          | 5.351                          | 0.92            |
| hsa-miR-135b-5p   | STAT6       | Position 1100-1107 of STAT6 3' UTR | 5'-GGGGUUAUAGAUCCU-AAGCCAU  | 8mer      | -0.49             | 99                               | -0.49                          | 5.351                          | 0.92            |
| hsa-miR-138-5p    | TNFSF4      | Position 29-36 of TNFSF4 3' UTR    | 5'-AUUUCUAAAACCAGGCACGCA    | 8mer      | -0.43             | 97                               | -0.43                          | 2.7                            | 0.34            |
| hsa-miR-325-3p    | TNFRSF18    | Position 62-69 of TNFRSF18 3' UTR  | 5'-GGCUGCAGGGGACCU-UCAAUAAA | 8mer      | -0.4              | 98                               | -0.4                           | 2.808                          | N/A             |
| hsa-miR-326       | TNFSF14     | Position 555-562 of TNFSF14 3' UTR | 5'-UACUAGGACAAAACCAGAGA     | 8mer      | -0.39             | 98                               | -0.39                          | 2.182                          | N/A             |
| hsa-miR-455-3p.1  | CD80        | Position 773-780 of CD80 3' UTR    | 5'-UUAUCUGUUUAUUGGACUGA     | 8mer      | -0.39             | 98                               | -0.39                          | 4.636                          | 0.3             |
| hsa-miR-130a-3p   | TNF         | Position 451-457 of TNF 3' UTR     | 5'-UCCCUCUAAUUAUGUUGCACUU   | 7mer-m8   | -0.38             | 98                               | -0.38                          | 3.438                          | 0.49            |
| hsa-miR-326       | CD8A        | Position 361-368 of CD8A 3' UTR    | 5'-AGGGGGAGGCCUAAAAGCCAGAGA | 8mer      | -0.38             | 98                               | -0.38                          | 1.864                          | N/A             |
| hsa-miR-141-3p    | TGFB2       | Position 109-116 of TGFB2 3' UTR   | 5'-AGAGCCUUGGUUCAUGUGUUA    | 8mer      | -0.37             | 99                               | -0.37                          | 5.541                          | 0.81            |
| hsa-miR-200a-3p   | TGFB2       | Position 109-116 of TGFB2 3' UTR   | 5'-AGAGCCUUGGUUCAUGUGUUA    | 8mer      | -0.37             | 99                               | -0.37                          | 5.541                          | 0.81            |
| hsa-miR-330-5p    | TNFSF14     | Position 555-562 of TNFSF14 3' UTR | 5'-UACUAGGACAAAACCAGAGA     | 8mer      | -0.37             | 98                               | -0.37                          | 2.182                          | N/A             |
| hsa-miR-130b-3p   | TNF         | Position 451-457 of TNF 3' UTR     | 5'-UCCCUCUAAUUAUGUUGCACUU   | 7mer-m8   | -0.36             | 98                               | -0.36                          | 3.438                          | 0.49            |
| hsa-miR-454-3p    | TNF         | Position 451-457 of TNF 3' UTR     | 5'-UCCCUCUAAUUAUGUUGCACUU   | 7mer-m8   | -0.36             | 98                               | -0.36                          | 3.438                          | 0.49            |
| hsa-miR-3666      | TNF         | Position 451-457 of TNF 3' UTR     | 5'-UCCCUCUAAUUAUGUUGCACUU   | 7mer-m8   | -0.35             | 98                               | -0.35                          | 3.438                          | 0.49            |
| hsa-miR-6766-3p   | CD226       | Position 1993-2000 of CD226 3' UTR | 5'-UUUCUGAUGUAAA-GACAAUCA   | 8mer      | -0.35             | 96                               | 0                              | 1.924                          | < 0.1           |
| hsa-let-7d-5p     | IL10        | Position 140-146 of IL10 3' UTR    | 5'-AUUUUUUACCUCUGAUACCUCAA  | 7mer-A1   | -0.35             | 92                               | -0.35                          | 6.938                          | 0.95            |
| hsa-miR-301a-3p   | TNF         | Position 451-457 of TNF 3' UTR     | 5'-UCCCUCUAAUUAUGUUGCACUU   | 7mer-m8   | -0.34             | 98                               | -0.34                          | 3.438                          | 0.49            |
| hsa-miR-101-3p.1  | IL13        | Position 547-553 of IL13 3' UTR    | 5'-AGUCCUUGGUAUUAUGUUGGUG   | 7mer-m8   | -0.34             | 97                               | -0.34                          | 3.827                          | 0.73            |
| hsa-miR-135a-5p   | GATA3       | Position 207-213 of GATA3 3' UTR   | 5'-ACCCCAUCUGUGAAU-AAGCCAUU | 7mer-m8   | -0.34             | 97                               | -0.34                          | 4.672                          | 0.7             |
| hsa-miR-135b-5p   | GATA3       | Position 207-213 of GATA3 3' UTR   | 5'-ACCCCAUCUGUGAAU-AAGCCAUU | 7mer-m8   | -0.34             | 97                               | -0.34                          | 4.672                          | 0.7             |
| hsa-miR-301b-3p   | TNF         | Position 451-457 of TNF 3' UTR     | 5'-UCCCUCUAAUUAUGUUGCACUU   | 7mer-m8   | -0.34             | 97                               | -0.34                          | 3.438                          | 0.49            |
| hsa-miR-4319      | IFNG        | Position 250-256 of IFNG 3' UTR    | 5'-AUUACAAGGCUUUAUCUCAGGGG  | 7mer-m8   | -0.34             | 96                               | -0.34                          | 3.121                          | 0.3             |
| hsa-miR-330-5p    | CD8A        | Position 361-368 of CD8A 3' UTR    | 5'-AGGGGGAGGCCUAAAAGCCAGAGA | 8mer      | -0.33             | 97                               | -0.33                          | 1.864                          | N/A             |
| hsa-miR-219a-5p   | CD226       | Position 1993-2000 of CD226 3' UTR | 5'-UUUCUGAUGUAAAAGACAAUCA   | 8mer      | -0.33             | 96                               | 0                              | 1.924                          | < 0.1           |
| hsa-miR-4782-3p   | CD226       | Position 1993-2000 of CD226 3' UTR | 5'-UUUCUGAUGUAAAAGACAAUCA   | 8mer      | -0.33             | 96                               | 0                              | 1.924                          | < 0.1           |
| hsa-let-7e-5p     | IL10        | Position 140-146 of IL10 3' UTR    | 5'-AUUUUUUACCUCUGAUACCUCAA  | 7mer-A1   | -0.33             | 91                               | -0.33                          | 6.938                          | 0.95            |
| hsa-miR-4458      | IL10        | Position 140-146 of IL10 3' UTR    | 5'-AUUUUUUACCUCUGAUACCUCAA  | 7mer-A1   | -0.33             | 91                               | -0.33                          | 6.938                          | 0.95            |
| hsa-miR-15a-5p    | CD163       | Position 154-160 of CD163 3' UTR   | 5'-UAGGAUUCUUAAGACUGCUGCUG  | 7mer-m8   | -0.32             | 96                               | -0.32                          | 3.246                          | 0.51            |
| hsa-miR-15b-5p    | CD163       | Position 154-160 of CD163 3' UTR   | 5'-UAGGAUUCUUAAGACUGCUGCUG  | 7mer-m8   | -0.32             | 96                               | -0.32                          | 3.246                          | 0.51            |
| hsa-miR-16-5p     | CD163       | Position 154-160 of CD163 3' UTR   | 5'-UAGGAUUCUUAAGACUGCUGCUG  | 7mer-m8   | -0.32             | 96                               | -0.32                          | 3.246                          | 0.51            |
| hsa-miR-195-5p    | CD163       | Position 154-160 of CD163 3' UTR   | 5'-UAGGAUUCUUAAGACUGCUGCUG  | 7mer-m8   | -0.32             | 96                               | -0.32                          | 3.246                          | 0.51            |
| hsa-miR-125a-5p   | VTCN1       | Position 304-311 of VTCN1 3' UTR   | 5'-AGUGCAUCCCCAGAUUCAGGGA   | 8mer      | -0.32             | 96                               | -0.31                          | 3.287                          | 0.69            |
| hsa-miR-125b-5p   | VTCN1       | Position 304-311 of VTCN1 3' UTR   | 5'-AGUGCAUCCCCAGAUUCAGGGA   | 8mer      | -0.32             | 96                               | -0.31                          | 3.287                          | 0.69            |
| hsa-let-7a-5p     | CD86        | Position 435-441 of CD86 3' UTR    | 5'-CCUGUGACUAAACAA-CUACCUC  | 7mer-m8   | -0.32             | 91                               | -0.32                          | 3.203                          | 0.5             |
| hsa-let-7b-5p     | CD86        | Position 435-441 of CD86 3' UTR    | 5'-CCUGUGACUAAACAA-CUACCUC  | 7mer-m8   | -0.32             | 91                               | -0.32                          | 3.203                          | 0.5             |
| hsa-let-7b-5p     | IL10        | Position 140-146 of IL10 3' UTR    | 5'-AUUUUUUACCUCUGAUACCUCAA  | 7mer-A1   | -0.32             | 91                               | -0.32                          | 6.938                          | 0.95            |
| hsa-let-7c-5p     | CD86        | Position 435-441 of CD86 3' UTR    | 5'-CCUGUGACUAAACAA-CUACCUC  | 7mer-m8   | -0.32             | 91                               | -0.32                          | 3.203                          | 0.5             |
| hsa-let-7e-5p     | CD86        | Position 435-441 of CD86 3' UTR    | 5'-CCUGUGACUAAACAA-CUACCUC  | 7mer-m8   | -0.32             | 91                               | -0.32                          | 3.203                          | 0.5             |
| hsa-let-7f-5p     | CD86        | Position 435-441 of CD86 3' UTR    | 5'-CCUGUGACUAAACAA-CUACCUC  | 7mer-m8   | -0.32             | 91                               | -0.32                          | 3.203                          | 0.5             |
| hsa-let-7g-5p     | CD86        | Position 435-441 of CD86 3' UTR    | 5'-CCUGUGACUAAACAA-CUACCUC  | 7mer-m8   | -0.32             | 91                               | -0.32                          | 3.203                          | 0.5             |
| hsa-let-7i-5p     | CD86        | Position 435-441 of CD86 3' UTR    | 5'-CCUGUGACUAAACAA-CUACCUC  | 7mer-m8   | -0.32             | 91                               | -0.32                          | 3.203                          | 0.5             |
| hsa-miR-4500      | CD86        | Position 435-441 of CD86 3' UTR    | 5'-CCUGUGACUAAACAA-CUACCUC  | 7mer-m8   | -0.32             | 91                               | -0.32                          | 3.203                          | 0.5             |
| hsa-miR-98-5p     | CD86        | Position 435-441 of CD86 3' UTR    | 5'-CCUGUGACUAAACAA-CUACCUC  | 7mer-m8   | -0.32             | 91                               | -0.32                          | 3.203                          | 0.5             |
| hsa-let-7a-5p     | IL10        | Position 140-146 of IL10 3' UTR    | 5'-AUUUUUUACCUCUGAUACCUCAA  | 7mer-A1   | -0.32             | 90                               | -0.32                          | 6.938                          | 0.95            |
| hsa-let-7c-5p     | IL10        | Position 140-146 of IL10 3' UTR    | 5'-AUUUUUUACCUCUGAUACCUCAA  | 7mer-A1   | -0.32             | 90                               | -0.32                          | 6.938                          | 0.95            |
| hsa-let-7f-5p     | IL10        | Position 140-146 of IL10 3' UTR    | 5'-AUUUUUUACCUCUGAUACCUCAA  | 7mer-A1   | -0.32             | 90                               | -0.32                          | 6.938                          | 0.95            |
| hsa-let-7g-5p     | IL10        | Position 140-146 of IL10 3' UTR    | 5'-AUUUUUUACCUCUGAUACCUCAA  | 7mer-A1   | -0.32             | 90                               | -0.32                          | 6.938                          | 0.95            |
| hsa-miR-98-5p     | IL10        | Position 140-146 of IL10 3' UTR    | 5'-AUUUUUUACCUCUGAUACCUCAA  | 7mer-A1   | -0.32             | 90                               | -0.32                          | 6.938                          | 0.95            |
| hsa-miR-4319      | VTCN1       | Position 304-311 of VTCN1 3' UTR   | 5'-AGUGCAUCCCCAGAUUCAGGGA   | 8mer      | -0.31             | 96                               | -0.31                          | 3.287                          | 0.69            |
| hsa-miR-497-5p    | CD163       | Position 154-160 of CD163 3' UTR   | 5'-UAGGAUUCUUAAGACUGCUGCUG  | 7mer-m8   | -0.31             | 96                               | -0.31                          | 3.246                          | 0.51            |
| hsa-miR-6838-5p   | CD163       | Position 154-160 of CD163 3' UTR   | 5'-UAGGAUUCUUAAGACUGCUGCUG  | 7mer-m8   | -0.31             | 96                               | -0.31                          | 3.246                          | 0.51            |
| hsa-miR-125b-5p   | IFNG        | Position 250-256 of IFNG 3' UTR    | 5'-AUUACAAGGCUUUAUCUCAGGGG  | 7mer-m8   | -0.31             | 95                               | -0.31                          | 3.121                          | 0.3             |
| hsa-let-7i-5p     | IL10        | Position 140-146 of IL10 3' UTR    | 5'-AUUUUUUACCUCUGAUACCUCAA  | 7mer-A1   | -0.31             | 89                               | -0.31                          | 6.938                          | 0.95            |
| hsa-miR-136-5p    | CD3G        | Position 132-139 of CD3G 3' UTR    | 5'-UUCCCAGAUUGACAAUUGGAGA   | 8mer      | -0.3              | 97                               | -0.3                           | 3.679                          | N/A             |
| hsa-miR-4295      | TNF         | Position 451-457 of TNF 3' UTR     | 5'-UCCCUCUAAUUAUGUUGCACUU   | 7mer-m8   | -0.3              | 96                               | -0.3                           | 3.438                          | 0.49            |

(Continued)

| miRNA             | Target gene | Position of target region           | Predicted target sequence   | Site type | Context+ score | Context++ score percentile | Weighted context+++ score | Conserve d branch length | P <sub>CT</sub> |
|-------------------|-------------|-------------------------------------|-----------------------------|-----------|----------------|----------------------------|---------------------------|--------------------------|-----------------|
| hsa-let-7d-5p     | CD86        | Position 435-441 of CD86 3' UTR     | 5'-CCUGUGACUAAAACUACCUC     | 7mer-m8   | -0.3           | 88                         | -0.3                      | 3.203                    | 0.5             |
| hsa-miR-424-5p    | CD163       | Position 154-160 of CD163 3' UTR    | 5'-UAGGAUUCUUAAGACUGCUGCUG  | 7mer-m8   | -0.29          | 95                         | -0.28                     | 3.246                    | 0.51            |
| hsa-miR-5195-3p   | CD40        | Position 568-575 of CD40 3' UTR     | 5'-UUUGUGAUAGUGAACACUCGGAA  | 8mer      | -0.29          | 94                         | -0.29                     | 2.055                    | 0.13            |
| hsa-miR-29a-3p    | TBX21       | Position 245-251 of TBX21 3' UTR    | 5'-CUACAGUCUUUACC-UGGUGCUG  | 7mer-m8   | -0.29          | 92                         | -0.29                     | 4.504                    | 0.84            |
| hsa-miR-29b-3p    | TBX21       | Position 245-251 of TBX21 3' UTR    | 5'-CUACAGUCUUUACC-UGGUGCUG  | 7mer-m8   | -0.29          | 92                         | -0.29                     | 4.504                    | 0.84            |
| hsa-miR-29c-3p    | TBX21       | Position 245-251 of TBX21 3' UTR    | 5'-CUACAGUCUUUACC-UGGUGCUG  | 7mer-m8   | -0.29          | 92                         | -0.29                     | 4.504                    | 0.84            |
| hsa-miR-4500      | IL10        | Position 140-146 of IL10 3' UTR     | 5'-AUUUUUUACCUCUGAUACCUCAA  | 7mer-A1   | -0.29          | 88                         | -0.29                     | 6.938                    | 0.95            |
| hsa-miR-372-3p    | PDCD1LG2    | Position 125-131 of PDCD1LG2 3' UTR | 5'-GCCUUUGGAUGACCAGCACUUU   | 7mer-m8   | -0.28          | 97                         | -0.28                     | 3.715                    | 0.52            |
| hsa-miR-125a-5p   | IFNG        | Position 250-256 of IFNG 3' UTR     | 5'-AUUACAAGGCUUUAUCUCAGGG   | 7mer-m8   | -0.28          | 95                         | -0.28                     | 3.121                    | 0.3             |
| hsa-miR-5195-3p   | CD40        | Position 409-416 of CD40 3' UTR     | 5'-UUUGUGAUAGUGAACACUCGGAA  | 8mer      | -0.28          | 93                         | -0.28                     | 2.055                    | 0.13            |
| hsa-miR-133a-3p.1 | TNFRSF14    | Position 180-186 of TNFRSF14 3' UTR | 5'-ACGAAGCGCGAGCUGGGACCAG   | 7mer-m8   | -0.28          | 89                         | -0.28                     | 3.253                    | N/A             |
| hsa-miR-4458      | CD86        | Position 435-441 of CD86 3' UTR     | 5'-CCUGUGACUAAAACUACCUC     | 7mer-m8   | -0.28          | 85                         | -0.28                     | 3.203                    | 0.5             |
| hsa-miR-302a-3p   | PDCD1LG2    | Position 125-131 of PDCD1LG2 3' UTR | 5'-GCCUUUGGAUGACCAGCACUUU   | 7mer-m8   | -0.27          | 96                         | -0.27                     | 3.715                    | 0.52            |
| hsa-miR-302b-3p   | PDCD1LG2    | Position 125-131 of PDCD1LG2 3' UTR | 5'-GCCUUUGGAUGACCAGCACUUU   | 7mer-m8   | -0.27          | 96                         | -0.27                     | 3.715                    | 0.52            |
| hsa-miR-302c-3p.1 | PDCD1LG2    | Position 125-131 of PDCD1LG2 3' UTR | 5'-GCCUUUGGAUGACCAGCACUUU   | 7mer-m8   | -0.27          | 96                         | -0.27                     | 3.715                    | 0.52            |
| hsa-miR-302d-3p   | PDCD1LG2    | Position 125-131 of PDCD1LG2 3' UTR | 5'-GCCUUUGGAUGACCAGCACUUU   | 7mer-m8   | -0.27          | 96                         | -0.27                     | 3.715                    | 0.52            |
| hsa-miR-302e      | PDCD1LG2    | Position 125-131 of PDCD1LG2 3' UTR | 5'-GCCUUUGGAUGACCAGCACUUU   | 7mer-m8   | -0.27          | 96                         | -0.27                     | 3.715                    | 0.52            |
| hsa-miR-15a-5p    | CD163       | Position 132-138 of CD163 3' UTR    | 5'-UAGGAUUCUUAAGACUGCUGCUG  | 7mer-m8   | -0.27          | 93                         | -0.26                     | 3.246                    | 0.51            |
| hsa-miR-15b-5p    | CD163       | Position 132-138 of CD163 3' UTR    | 5'-UAGGAUUCUUAAGACUGCUGCUG  | 7mer-m8   | -0.27          | 93                         | -0.26                     | 3.246                    | 0.51            |
| hsa-miR-16-5p     | CD163       | Position 132-138 of CD163 3' UTR    | 5'-UAGGAUUCUUAAGACUGCUGCUG  | 7mer-m8   | -0.27          | 93                         | -0.26                     | 3.246                    | 0.51            |
| hsa-miR-195-5p    | CD163       | Position 132-138 of CD163 3' UTR    | 5'-UAGGAUUCUUAAGACUGCUGCUG  | 7mer-m8   | -0.27          | 93                         | -0.26                     | 3.246                    | 0.51            |
| hsa-miR-325-3p    | TNFRSF18    | Position 315-322 of TNFRSF18 3' UTR | 5'-GGCUGACCGGGACCU-UCAUAAA  | 8mer      | -0.26          | 96                         | -0.26                     | 2.808                    | N/A             |
| hsa-miR-6838-5p   | CD163       | Position 132-138 of CD163 3' UTR    | 5'-UAGGAUUCUUAAGACUGCUGCUG  | 7mer-m8   | -0.26          | 92                         | -0.25                     | 3.246                    | 0.51            |
| hsa-miR-520b      | PDCD1LG2    | Position 125-131 of PDCD1LG2 3' UTR | 5'-GCCUUUGGAUGACCAGCACUUU   | 7mer-m8   | -0.25          | 95                         | -0.25                     | 3.715                    | 0.52            |
| hsa-miR-520c-3p   | PDCD1LG2    | Position 125-131 of PDCD1LG2 3' UTR | 5'-GCCUUUGGAUGACCAGCACUUU   | 7mer-m8   | -0.25          | 95                         | -0.25                     | 3.715                    | 0.52            |
| hsa-miR-520e      | PDCD1LG2    | Position 125-131 of PDCD1LG2 3' UTR | 5'-GCCUUUGGAUGACCAGCACUUU   | 7mer-m8   | -0.25          | 95                         | -0.25                     | 3.715                    | 0.52            |
| hsa-miR-497-5p    | CD163       | Position 132-138 of CD163 3' UTR    | 5'-UAGGAUUCUUAAGACUGCUGCUG  | 7mer-m8   | -0.25          | 93                         | -0.25                     | 3.246                    | 0.51            |
| hsa-miR-296-3p    | CD40LG      | Position 97-103 of CD40LG 3' UTR    | 5'-UAACUCCUUAUUUAACCCUAG    | 7mer-A1   | -0.24          | 95                         | -0.24                     | 3.812                    | N/A             |
| hsa-miR-520d-3p   | PDCD1LG2    | Position 125-131 of PDCD1LG2 3' UTR | 5'-GCCUUUGGAUGACCAGCACUUU   | 7mer-m8   | -0.24          | 95                         | -0.24                     | 3.715                    | 0.52            |
| hsa-miR-532-5p    | CD40LG      | Position 141-147 of CD40LG 3' UTR   | 5'-UUUUAUUUAUCACUCCAAAGGAUG | 7mer-m8   | -0.24          | 95                         | -0.24                     | 2.835                    | N/A             |
| hsa-miR-143-3p    | HHLA2       | Position 56-62 of HHLA2 3' UTR      | 5'-UAAUUAUCCAGUGACUUAUCUCC  | 7mer-m8   | -0.23          | 95                         | -0.23                     | 3.151                    | 0.24            |
| hsa-miR-145-5p    | CD40        | Position 568-575 of CD40 3' UTR     | 5'-UUUGUGAUAGUGAACACUCGGAA  | 8mer      | -0.23          | 94                         | -0.23                     | 2.055                    | 0.13            |
| hsa-miR-424-5p    | CD163       | Position 132-138 of CD163 3' UTR    | 5'-UAGGAUUCUUAAGACUGCUGCUG  | 7mer-m8   | -0.23          | 91                         | -0.23                     | 3.246                    | 0.51            |
| hsa-miR-520a-3p   | PDCD1LG2    | Position 125-131 of PDCD1LG2 3' UTR | 5'-GCCUUUGGAUGACCAGCACUUU   | 7mer-m8   | -0.22          | 94                         | -0.22                     | 3.715                    | 0.52            |
| hsa-miR-145-5p    | CD40        | Position 409-416 of CD40 3' UTR     | 5'-UUUGUGAUAGUGAACACUCGGAA  | 8mer      | -0.22          | 93                         | -0.22                     | 2.055                    | 0.13            |
| hsa-miR-155-5p    | CTLA4       | Position 296-302 of CTLA4 3' UTR    | 5'-UUAAUUAUUGGGAGUCAGCAUUU  | 7mer-m8   | -0.22          | 90                         | -0.22                     | 3.27                     | 0.23            |
| hsa-miR-15a-5p    | IL2RB       | Position 182-188 of IL2RB 3' UTR    | 5'-UUUCCAACUCCAC-UGCUGCUC   | 7mer-m8   | -0.22          | 89                         | -0.22                     | 4.494                    | 0.67            |
| hsa-miR-182-5p    | CD96        | Position 392-399 of CD96 3' UTR     | 5'-AACAUUGUAAACUUCUUGCCAA   | 8mer      | -0.22          | 88                         | -0.22                     | 2.463                    | 0.21            |
| hsa-miR-140-3p.1  | IL12RB2     | Position 448-454 of IL12RB2 3' UTR  | 5'-ACCCACUCACCUUCU-CCUGUGGU | 7mer-m8   | -0.21          | 93                         | -0.21                     | 3.082                    | N/A             |
| hsa-miR-140-3p.2  | CD274       | Position 43-49 of CD274 3' UTR      | 5'-GCAGGGAUUCUACCCUGUGUU    | 7mer-m8   | -0.21          | 93                         | -0.21                     | 3.082                    | 0.21            |
| hsa-miR-15b-5p    | IL2RB       | Position 182-188 of IL2RB 3' UTR    | 5'-UUUCCAACUCCAC-UGCUGCUC   | 7mer-m8   | -0.21          | 88                         | -0.21                     | 4.494                    | 0.67            |
| hsa-miR-28a-5p    | ICOS        | Position 58-64 of ICOS 3' UTR       | 5'-GGCCAGUUUCCUCA-ACUUGAAG  | 7mer-A1   | -0.2           | 93                         | -0.2                      | 3.645                    | 0.41            |
| hsa-miR-28b-5p    | ICOS        | Position 58-64 of ICOS 3' UTR       | 5'-GGCCAGUUUCCUCA-ACUUGAAG  | 7mer-A1   | -0.2           | 93                         | -0.2                      | 3.645                    | 0.41            |
| hsa-miR-181b-5p   | CD4         | Position 74-81 of CD4 3' UTR        | 5'-UGCCUCGCGACCAGA-UGAAUGUA | 8mer      | -0.2           | 92                         | -0.2                      | 4.488                    | 0.69            |
| hsa-miR-181c-5p   | CD4         | Position 74-81 of CD4 3' UTR        | 5'-UGCCUCGCGACCAGA-UGAAUGUA | 8mer      | -0.2           | 92                         | -0.2                      | 4.488                    | 0.69            |
| hsa-miR-4770      | HHLA2       | Position 56-62 of HHLA2 3' UTR      | 5'-UAAUUAUCCAGUGACUUAUCUCC  | 7mer-m8   | -0.2           | 92                         | -0.2                      | 3.151                    | 0.24            |
| hsa-miR-181a-5p   | CD4         | Position 74-81 of CD4 3' UTR        | 5'-UGCCUCGCGACCAGA-UGAAUGUA | 8mer      | -0.2           | 91                         | -0.2                      | 4.488                    | 0.69            |
| hsa-miR-181d-5p   | CD4         | Position 74-81 of CD4 3' UTR        | 5'-UGCCUCGCGACCAGA-UGAAUGUA | 8mer      | -0.2           | 91                         | -0.2                      | 4.488                    | 0.69            |
| hsa-miR-497-5p    | IL2RB       | Position 182-188 of IL2RB 3' UTR    | 5'-UUUCCAACUCCAC-UGCUGCUC   | 7mer-m8   | -0.2           | 88                         | -0.2                      | 4.494                    | 0.67            |
| hsa-miR-373-3p    | PDCD1LG2    | Position 125-131 of PDCD1LG2 3' UTR | 5'-GCCUUUGGAUGACCAGCACUUU   | 7mer-m8   | -0.19          | 96                         | -0.19                     | 3.715                    | 0.52            |
| hsa-miR-26a-5p    | ICOS        | Position 50-56 of ICOS 3' UTR       | 5'-GGCCAGUUUCCUCA-ACUUGAAG  | 7mer-A1   | -0.19          | 93                         | -0.19                     | 3.645                    | 0.41            |
| hsa-miR-26b-5p    | ICOS        | Position 50-56 of ICOS 3' UTR       | 5'-GGCCAGUUUCCUCA-ACUUGAAG  | 7mer-A1   | -0.19          | 93                         | -0.19                     | 3.645                    | 0.41            |
| hsa-miR-425-5p    | TGFB1       | Position 151-157 of TGFB1 3' UTR    | 5'-GGACUCGCGAGUUCUUGUUAU    | 7mer-m8   | -0.19          | 93                         | 0                         | 3.093                    | < 0.1           |
| hsa-miR-15a-5p    | PDCD1       | Position 305-311 of PDCD1 3' UTR    | 5'-AGCUCUCCUGAUCUCUGCUGCUG  | 7mer-m8   | -0.19          | 86                         | -0.19                     | 2.877                    | 0.44            |
| hsa-miR-15b-5p    | PDCD1       | Position 305-311 of PDCD1 3' UTR    | 5'-AGCUCUCCUGAUCUCUGCUGCUG  | 7mer-m8   | -0.19          | 86                         | -0.19                     | 2.877                    | 0.44            |
| hsa-miR-16-5p     | PDCD1       | Position 305-311 of PDCD1 3' UTR    | 5'-AGCUCUCCUGAUCUCUGCUGCUG  | 7mer-m8   | -0.19          | 86                         | -0.19                     | 2.877                    | 0.44            |
| hsa-miR-195-5p    | PDCD1       | Position 305-311 of PDCD1 3' UTR    | 5'-AGCUCUCCUGAUCUCUGCUGCUG  | 7mer-m8   | -0.19          | 86                         | -0.19                     | 2.877                    | 0.44            |
| hsa-miR-424-5p    | PDCD1       | Position 305-311 of PDCD1 3' UTR    | 5'-AGCUCUCCUGAUCUCUGCUGCUG  | 7mer-m8   | -0.19          | 86                         | -0.19                     | 2.877                    | 0.44            |
| hsa-miR-142-3p.1  | BTLA        | Position 370-376 of BTLA 3' UTR     | 5'-UUACUCGCAUCAGUUCACUACAC  | 7mer-A1   | -0.19          | 82                         | -0.19                     | 5.172                    | 0.68            |
| hsa-miR-4465      | ICOS        | Position 58-64 of ICOS 3' UTR       | 5'-GGCCAGUUUCCUCAACUUGAAG   | 7mer-A1   | -0.18          | 91                         | -0.18                     | 3.645                    | 0.41            |
| hsa-miR-4465      | ICOS        | Position 50-56 of ICOS 3' UTR       | 5'-GGCCAGUUUCCUCAACUUGAAG   | 7mer-A1   | -0.18          | 91                         | -0.18                     | 3.645                    | 0.41            |
| hsa-miR-6088      | HHLA2       | Position 56-62 of HHLA2 3' UTR      | 5'-UAAUUAUCCAGUGACUUAUCUCC  | 7mer-m8   | -0.18          | 91                         | -0.18                     | 3.151                    | 0.24            |
| hsa-miR-497-5p    | PDCD1       | Position 305-311 of PDCD1 3' UTR    | 5'-AGCUCUCCUGAUCUCUGCUGCUG  | 7mer-m8   | -0.18          | 86                         | -0.18                     | 2.877                    | 0.44            |
| hsa-miR-424-5p    | IL2RB       | Position 182-188 of IL2RB 3' UTR    | 5'-UUUCCAACUCCACUCCUGCUGCUC | 7mer-m8   | -0.18          | 85                         | -0.18                     | 4.494                    | 0.67            |
| hsa-miR-6838-5p   | PDCD1       | Position 305-311 of PDCD1 3' UTR    | 5'-AGCUCUCCUGAUCUCUGCUGCUG  | 7mer-m8   | -0.18          | 85                         | -0.18                     | 2.877                    | 0.44            |
| hsa-miR-1297      | ICOS        | Position 58-64 of ICOS 3' UTR       | 5'-GGCCAGUUUCCUCAACUUGAAG   | 7mer-A1   | -0.17          | 91                         | -0.17                     | 3.645                    | 0.41            |
| hsa-miR-1297      | ICOS        | Position 50-56 of ICOS 3' UTR       | 5'-GGCCAGUUUCCUCAACUUGAAG   | 7mer-A1   | -0.17          | 91                         | -0.17                     | 3.645                    | 0.41            |
| hsa-miR-16-5p     | IL2RB       | Position 182-188 of IL2RB 3' UTR    | 5'-UUUCCAACUCCACUCCUGCUGCUC | 7mer-m8   | -0.17          | 84                         | -0.17                     | 4.494                    | 0.67            |
| hsa-miR-195-5p    | IL2RB       | Position 182-188 of IL2RB 3' UTR    | 5'-UUUCCAACUCCACUCCUGCUGCUC | 7mer-m8   | -0.17          | 84                         | -0.17                     | 4.494                    | 0.67            |
| hsa-miR-340-5p    | IL4         | Position 52-58 of IL4 3' UTR        | 5'-UUAAGAUUUUAUUAUUUAUAC    | 7mer-A1   | -0.16          | 98                         | -0.16                     | 4.169                    | N/A             |
| hsa-miR-6835-3p   | TNFSF18     | Position 615-622 of TNFSF18 3' UTR  | 5'-UCCUCAGGAUCGAGGUGUUAU    | 8mer      | -0.16          | 95                         | -0.16                     | 1.975                    | N/A             |
| hsa-miR-15a-5p    | PDCD1       | Position 308-314 of PDCD1 3' UTR    | 5'-UCCUCGAUCUCUGCUGCUGCUG   | 7mer-m8   | -0.16          | 82                         | -0.16                     | 2.877                    | 0.44            |
| hsa-miR-15b-5p    | PDCD1       | Position 308-314 of PDCD1 3' UTR    | 5'-UCCUCGAUCUCUGCUGCUGCUG   | 7mer-m8   | -0.16          | 82                         | -0.16                     | 2.877                    | 0.44            |
| hsa-miR-16-5p     | PDCD1       | Position 308-314 of PDCD1 3' UTR    | 5'-UCCUCGAUCUCUGCUGCUGCUG   | 7mer-m8   | -0.16          | 82                         | -0.16                     | 2.877                    | 0.44            |



(Continued)

| miRNA             | Target gene | Position of target region          | Predicted target sequence    | Site type | Context+ score | Context++ score percentile | Weighted context++ score | Conserve d branch length | P <sub>CT</sub> |
|-------------------|-------------|------------------------------------|------------------------------|-----------|----------------|----------------------------|--------------------------|--------------------------|-----------------|
| hsa-miR-195-5p    | PDCD1       | Position 308-314 of PDCD1 3' UTR   | 5'-UCCUCUGAAUCUCUGCUGCUGCUG  | 7mer-m8   | -0.16          | 82                         | -0.16                    | 2.877                    | 0.44            |
| hsa-miR-6838-5p   | IL2RB       | Position 182-188 of IL2RB 3' UTR   | 5'-UUUCGAAACUCCACUCUGCUGCUC  | 7mer-m8   | -0.16          | 82                         | -0.16                    | 4.494                    | 0.67            |
| hsa-miR-6838-5p   | PDCD1       | Position 308-314 of PDCD1 3' UTR   | 5'-UCCUCUGAAUCUCUGCUGCUGCUG  | 7mer-m8   | -0.16          | 81                         | -0.16                    | 2.877                    | 0.44            |
| hsa-miR-141-3p    | TGFB2       | Position 300-306 of TGFB2 3' UTR   | 5'-CUGGAGAUAUUUAUAGUGUUA     | 7mer-A1   | -0.15          | 88                         | -0.15                    | 5.221                    | 0.46            |
| hsa-miR-7153-5p   | CD3D        | Position 2339-2346 of CD3D 3' UTR  | 5'-CAUCCUCUAUUCGCCAGUUCUCA   | 8mer      | -0.15          | 86                         | 0                        | 1.878                    | < 0.1           |
| hsa-miR-424-5p    | PDCD1       | Position 308-314 of PDCD1 3' UTR   | 5'-UCCUCUGAAUCUCUGCUGCUGCUG  | 7mer-m8   | -0.15          | 80                         | -0.15                    | 2.877                    | 0.44            |
| hsa-miR-378a-3p   | CD3G        | Position 17-23 of CD3G 3' UTR      | 5'-CUCAGGACUCAGAGUAGUCCAGG   | 7mer-m8   | -0.14          | 79                         | -0.14                    | 5.231                    | N/A             |
| hsa-miR-378c      | CD3G        | Position 17-23 of CD3G 3' UTR      | 5'-CUCAGGACUCAGAGUAGUCCAGG   | 7mer-m8   | -0.14          | 79                         | -0.14                    | 5.231                    | N/A             |
| hsa-miR-378d      | CD3G        | Position 17-23 of CD3G 3' UTR      | 5'-CUCAGGACUCAGAGUAGUCCAGG   | 7mer-m8   | -0.14          | 79                         | -0.14                    | 5.231                    | N/A             |
| hsa-miR-378e      | CD3G        | Position 17-23 of CD3G 3' UTR      | 5'-CUCAGGACUCAGAGUAGUCCAGG   | 7mer-m8   | -0.14          | 79                         | -0.14                    | 5.231                    | N/A             |
| hsa-miR-378i      | CD3G        | Position 17-23 of CD3G 3' UTR      | 5'-CUCAGGACUCAGAGUAGUCCAGG   | 7mer-m8   | -0.14          | 79                         | -0.14                    | 5.231                    | N/A             |
| hsa-miR-410-3p    | IL4         | Position 45-51 of IL4 3' UTR       | 5'-UUUUUUUUUAAGUUAUUUAUUAU   | 7mer-A1   | -0.13          | 97                         | -0.13                    | 4.241                    | N/A             |
| hsa-miR-200a-3p   | TGFB2       | Position 300-306 of TGFB2 3' UTR   | 5'-CUGGAGAUAUUUAUAGUGUUA     | 7mer-A1   | -0.13          | 87                         | -0.13                    | 5.221                    | 0.46            |
| hsa-miR-16-5p     | PDCD1       | Position 311-317 of PDCD1 3' UTR   | 5'-CUGAAUCUCUGCUGCUGCUGCUG   | 7mer-m8   | -0.13          | 78                         | -0.13                    | 2.877                    | 0.44            |
| hsa-miR-195-5p    | PDCD1       | Position 311-317 of PDCD1 3' UTR   | 5'-CUGAAUCUCUGCUGCUGCUGCUG   | 7mer-m8   | -0.13          | 78                         | -0.13                    | 2.877                    | 0.44            |
| hsa-miR-155-5p    | CTLA4       | Position 259-265 of CTLA4 3' UTR   | 5'-UUAUAUAGGGGAUGCAGCAUUAU   | 7mer-m8   | -0.13          | 77                         | -0.13                    | 3.27                     | 0.23            |
| hsa-miR-6838-5p   | PDCD1       | Position 311-317 of PDCD1 3' UTR   | 5'-CUGAAUCUCUGCUGCUGCUGCUG   | 7mer-m8   | -0.13          | 77                         | -0.13                    | 2.877                    | 0.44            |
| hsa-miR-146a-5p   | CD3D        | Position 2339-2346 of CD3D 3' UTR  | 5'-CAUCCUCUAUUCGCCAGUUCUCA   | 8mer      | -0.12          | 81                         | 0                        | 1.878                    | < 0.1           |
| hsa-miR-497-5p    | PDCD1       | Position 308-314 of PDCD1 3' UTR   | 5'-UCCUCUGAAUCUCUGCUGCUGCUG  | 7mer-m8   | -0.12          | 77                         | -0.12                    | 2.877                    | 0.44            |
| hsa-miR-15b-5p    | PDCD1       | Position 311-317 of PDCD1 3' UTR   | 5'-CUGAAUCUCUGCUGCUGCUGCUG   | 7mer-m8   | -0.12          | 75                         | -0.12                    | 2.877                    | 0.44            |
| hsa-miR-146b-5p   | CD3D        | Position 2339-2346 of CD3D 3' UTR  | 5'-CAUCCUCUAUUCGCCAGUUCUCA   | 8mer      | -0.11          | 80                         | 0                        | 1.878                    | < 0.1           |
| hsa-miR-378h      | CD3G        | Position 17-23 of CD3G 3' UTR      | 5'-CUCAGGACUCAGAGUAGUCCAGG   | 7mer-m8   | -0.11          | 75                         | -0.11                    | 5.231                    | N/A             |
| hsa-miR-422a      | CD3G        | Position 17-23 of CD3G 3' UTR      | 5'-CUCAGGACUCAGAGUAGUCCAGG   | 7mer-m8   | -0.11          | 75                         | -0.11                    | 5.231                    | N/A             |
| hsa-miR-424-5p    | PDCD1       | Position 311-317 of PDCD1 3' UTR   | 5'-CUGAAUCUCUGCUGCUGCUGCUG   | 7mer-m8   | -0.11          | 74                         | -0.11                    | 2.877                    | 0.44            |
| hsa-miR-15a-5p    | PDCD1       | Position 311-317 of PDCD1 3' UTR   | 5'-CUGAAUCUCUGCUGCUGCUGCUG   | 7mer-m8   | -0.11          | 73                         | -0.11                    | 2.877                    | 0.44            |
| hsa-miR-4644      | CD4         | Position 300-306 of CD4 3' UTR     | 5'-UCUCUCACCCAGGAGUCUCUCCC   | 7mer-m8   | -0.11          | 73                         | -0.11                    | 3.09                     | N/A             |
| hsa-miR-4262      | CD4         | Position 74-81 of CD4 3' UTR       | 5'-UGCCUCGGGACCCAGAAUUAUUA   | 8mer      | -0.1           | 88                         | -0.1                     | 4.488                    | 0.69            |
| hsa-miR-325-3p    | TNFRSF4     | Position 192-198 of TNFRSF4 3' UTR | 5'-UGCCCGGGACCCACAAUAAAA     | 7mer-A1   | -0.1           | 82                         | -0.1                     | 4.787                    | N/A             |
| hsa-miR-497-5p    | PDCD1       | Position 311-317 of PDCD1 3' UTR   | 5'-CUGAAUCUCUGCUGCUGCUGCUG   | 7mer-m8   | -0.1           | 72                         | -0.1                     | 2.877                    | 0.44            |
| hsa-miR-6838-5p   | PDCD1       | Position 314-320 of PDCD1 3' UTR   | 5'-AUCUCUCUGCUGCUGCUGCUGCUG  | 7mer-m8   | -0.1           | 72                         | -0.1                     | 2.877                    | 0.44            |
| hsa-miR-6838-5p   | PDCD1       | Position 317-323 of PDCD1 3' UTR   | 5'-CUCUCUCUGCUGCUGCUGCUGCUG  | 7mer-m8   | -0.1           | 72                         | -0.1                     | 2.877                    | 0.44            |
| hsa-miR-4306      | CD4         | Position 300-306 of CD4 3' UTR     | 5'-UCUCUCACCCAGGAGUCUCUCCC   | 7mer-m8   | -0.1           | 71                         | -0.1                     | 3.09                     | N/A             |
| hsa-miR-185-5p    | CD4         | Position 300-306 of CD4 3' UTR     | 5'-UCUCUCACCCAGGAGUCUCUCCC   | 7mer-m8   | -0.1           | 70                         | -0.1                     | 3.09                     | N/A             |
| hsa-miR-124-3p.1  | CD276       | Position 262-268 of CD276 3' UTR   | 5'-AGUCAUCUCUGCUGCUGCUGCUG   | 7mer-A1   | -0.09          | 80                         | -0.08                    | 3.893                    | 0.7             |
| hsa-miR-195-5p    | PDCD1       | Position 314-320 of PDCD1 3' UTR   | 5'-AUCUCUCUGCUGCUGCUGCUGCUG  | 7mer-m8   | -0.09          | 71                         | -0.09                    | 2.877                    | 0.44            |
| hsa-miR-195-5p    | PDCD1       | Position 317-323 of PDCD1 3' UTR   | 5'-CUCUCUCUGCUGCUGCUGCUGCUG  | 7mer-m8   | -0.09          | 70                         | -0.09                    | 2.877                    | 0.44            |
| hsa-miR-378b      | CD3G        | Position 17-23 of CD3G 3' UTR      | 5'-CUCAGGACUCAGAGUAGUCCAGG   | 7mer-m8   | -0.09          | 70                         | -0.09                    | 5.231                    | N/A             |
| hsa-miR-378f      | CD3G        | Position 17-23 of CD3G 3' UTR      | 5'-CUCAGGACUCAGAGUAGUCCAGG   | 7mer-m8   | -0.09          | 70                         | -0.09                    | 5.231                    | N/A             |
| hsa-miR-15b-5p    | PDCD1       | Position 314-320 of PDCD1 3' UTR   | 5'-AUCUCUCUGCUGCUGCUGCUGCUG  | 7mer-m8   | -0.09          | 69                         | -0.09                    | 2.877                    | 0.44            |
| hsa-miR-15b-5p    | PDCD1       | Position 317-323 of PDCD1 3' UTR   | 5'-CUCUCUCUGCUGCUGCUGCUGCUG  | 7mer-m8   | -0.09          | 69                         | -0.09                    | 2.877                    | 0.44            |
| hsa-miR-6838-5p   | PDCD1       | Position 320-326 of PDCD1 3' UTR   | 5'-UGCUCUCUGCUGCUGCUGCUGCUG  | 7mer-m8   | -0.09          | 68                         | -0.09                    | 2.877                    | 0.44            |
| hsa-miR-6838-5p   | PDCD1       | Position 323-329 of PDCD1 3' UTR   | 5'-UGCUCUCUGCUGCUGCUGCUGCUG  | 7mer-m8   | -0.09          | 68                         | -0.09                    | 2.877                    | 0.44            |
| hsa-miR-203a-3p.1 | TGFB3       | Position 155-161 of TGFB3 3' UTR   | 5'-AGGUUUUCUUUUGAACAUUUCU    | 7mer-m8   | -0.08          | 82                         | -0.08                    | 4.012                    | 0.23            |
| hsa-miR-15a-5p    | PDCD1       | Position 314-320 of PDCD1 3' UTR   | 5'-AUCUCUCUGCUGCUGCUGCUGCUG  | 7mer-m8   | -0.08          | 67                         | -0.08                    | 2.877                    | 0.44            |
| hsa-miR-16-5p     | PDCD1       | Position 317-323 of PDCD1 3' UTR   | 5'-CUCUCUCUGCUGCUGCUGCUGCUG  | 7mer-m8   | -0.08          | 67                         | -0.08                    | 2.877                    | 0.44            |
| hsa-miR-195-5p    | PDCD1       | Position 323-329 of PDCD1 3' UTR   | 5'-UGCUCUCUGCUGCUGCUGCUGCUG  | 7mer-m8   | -0.08          | 67                         | -0.08                    | 2.877                    | 0.44            |
| hsa-miR-424-5p    | PDCD1       | Position 314-320 of PDCD1 3' UTR   | 5'-AUCUCUCUGCUGCUGCUGCUGCUG  | 7mer-m8   | -0.08          | 67                         | -0.08                    | 2.877                    | 0.44            |
| hsa-miR-424-5p    | PDCD1       | Position 317-323 of PDCD1 3' UTR   | 5'-CUCUCUCUGCUGCUGCUGCUGCUG  | 7mer-m8   | -0.08          | 67                         | -0.08                    | 2.877                    | 0.44            |
| hsa-miR-15a-5p    | PDCD1       | Position 317-323 of PDCD1 3' UTR   | 5'-CUCUCUCUGCUGCUGCUGCUGCUG  | 7mer-m8   | -0.08          | 66                         | -0.08                    | 2.877                    | 0.44            |
| hsa-miR-15b-5p    | PDCD1       | Position 323-329 of PDCD1 3' UTR   | 5'-UGCUCUCUGCUGCUGCUGCUGCUG  | 7mer-m8   | -0.08          | 65                         | -0.08                    | 2.877                    | 0.44            |
| hsa-miR-653-5p    | CD3G        | Position 203-209 of CD3G 3' UTR    | 5'-UAAAAACAAUACUGUUAUUCAG    | 7mer-m8   | -0.07          | 76                         | -0.07                    | 3.983                    | N/A             |
| hsa-miR-23a-3p    | TIGIT       | Position 1309-1316 of TIGIT 3' UTR | 5'-AAGGAACUCGAAAGAGAAUUGUGAA | 8mer      | -0.07          | 72                         | -0.07                    | 2.612                    | < 0.1           |
| hsa-miR-23c       | TIGIT       | Position 1309-1316 of TIGIT 3' UTR | 5'-AAGGAACUCGAAAGAGAAUUGUGAA | 8mer      | -0.07          | 71                         | -0.07                    | 2.612                    | < 0.1           |
| hsa-miR-195-5p    | PDCD1       | Position 320-326 of PDCD1 3' UTR   | 5'-UGCUCUCUGCUGCUGCUGCUGCUG  | 7mer-m8   | -0.07          | 66                         | -0.07                    | 2.877                    | 0.44            |
| hsa-miR-15b-5p    | PDCD1       | Position 320-326 of PDCD1 3' UTR   | 5'-UGCUCUCUGCUGCUGCUGCUGCUG  | 7mer-m8   | -0.07          | 64                         | -0.07                    | 2.877                    | 0.44            |
| hsa-miR-16-5p     | PDCD1       | Position 314-320 of PDCD1 3' UTR   | 5'-AUCUCUCUGCUGCUGCUGCUGCUG  | 7mer-m8   | -0.07          | 64                         | -0.07                    | 2.877                    | 0.44            |
| hsa-miR-497-5p    | PDCD1       | Position 314-320 of PDCD1 3' UTR   | 5'-AUCUCUCUGCUGCUGCUGCUGCUG  | 7mer-m8   | -0.07          | 64                         | -0.07                    | 2.877                    | 0.44            |
| hsa-miR-497-5p    | PDCD1       | Position 317-323 of PDCD1 3' UTR   | 5'-CUCUCUCUGCUGCUGCUGCUGCUG  | 7mer-m8   | -0.07          | 64                         | -0.07                    | 2.877                    | 0.44            |
| hsa-miR-16-5p     | PDCD1       | Position 323-329 of PDCD1 3' UTR   | 5'-UGCUCUCUGCUGCUGCUGCUGCUG  | 7mer-m8   | -0.07          | 63                         | -0.07                    | 2.877                    | 0.44            |
| hsa-miR-15a-5p    | PDCD1       | Position 323-329 of PDCD1 3' UTR   | 5'-UGCUCUCUGCUGCUGCUGCUGCUG  | 7mer-m8   | -0.07          | 62                         | -0.07                    | 2.877                    | 0.44            |
| hsa-miR-325-3p    | LTA         | Position 609-615 of LTA 3' UTR     | 5'-ACCCUCGAGUAGCCAAUAAAC     | 7mer-A1   | -0.06          | 74                         | -0.06                    | 4.819                    | N/A             |
| hsa-miR-23b-3p    | TIGIT       | Position 1309-1316 of TIGIT 3' UTR | 5'-AAGGAACUCGAAAGAGAAUUGUGAA | 8mer      | -0.06          | 68                         | -0.06                    | 2.612                    | < 0.1           |
| hsa-miR-16-5p     | PDCD1       | Position 320-326 of PDCD1 3' UTR   | 5'-UGCUCUCUGCUGCUGCUGCUGCUG  | 7mer-m8   | -0.06          | 62                         | -0.06                    | 2.877                    | 0.44            |
| hsa-miR-424-5p    | PDCD1       | Position 323-329 of PDCD1 3' UTR   | 5'-UGCUCUCUGCUGCUGCUGCUGCUG  | 7mer-m8   | -0.06          | 62                         | -0.06                    | 2.877                    | 0.44            |
| hsa-miR-424-5p    | PDCD1       | Position 320-326 of PDCD1 3' UTR   | 5'-UGCUCUCUGCUGCUGCUGCUGCUG  | 7mer-m8   | -0.06          | 61                         | -0.06                    | 2.877                    | 0.44            |
| hsa-miR-15a-5p    | PDCD1       | Position 320-326 of PDCD1 3' UTR   | 5'-UGCUCUCUGCUGCUGCUGCUGCUG  | 7mer-m8   | -0.06          | 60                         | -0.06                    | 2.877                    | 0.44            |
| hsa-miR-186-5p    | IL2         | Position 145-151 of IL2 3' UTR     | 5'-UAUGGAUCUUUAUUAUUCUUUU    | 7mer-m8   | -0.05          | 93                         | -0.05                    | 3.057                    | N/A             |
| hsa-miR-374a-5p   | CD40LG      | Position 128-134 of CD40LG 3' UTR  | 5'-UUAUGGAGAACUUAUUUAUUAUAC  | 7mer-m8   | -0.05          | 82                         | -0.05                    | 2.856                    | N/A             |
| hsa-miR-130a-5p   | TIGIT       | Position 1309-1316 of TIGIT 3' UTR | 5'-AAGGAACUCGAAAGAGAAUUGUGAA | 8mer      | -0.05          | 65                         | -0.05                    | 2.612                    | < 0.1           |
| hsa-miR-497-5p    | PDCD1       | Position 323-329 of PDCD1 3' UTR   | 5'-UGCUCUCUGCUGCUGCUGCUGCUG  | 7mer-m8   | -0.05          | 58                         | -0.05                    | 2.877                    | 0.44            |
| hsa-miR-497-5p    | PDCD1       | Position 320-326 of PDCD1 3' UTR   | 5'-UGCUCUCUGCUGCUGCUGCUGCUG  | 7mer-m8   | -0.05          | 56                         | -0.05                    | 2.877                    | 0.44            |
| hsa-miR-374b-5p   | CD40LG      | Position 128-134 of CD40LG 3' UTR  | 5'-UUAUGGAGAACUUAUUUAUUAUAC  | 7mer-m8   | -0.04          | 75                         | -0.04                    | 2.856                    | N/A             |
| hsa-miR-485-5p    | IL18R1      | Position 536-543 of IL18R1 3' UTR  | 5'-GAGGUCUCAGGGCCUCAGCCUCA   | 8mer      | -0.03          | 33                         | -0.03                    | 1.905                    | N/A             |
| hsa-miR-6884-5p   | IL18R1      | Position 536-543 of IL18R1 3' UTR  | 5'-GAGGUCUCAGGGCCUCAGCCUCA   | 8mer      | -0.03          | 32                         | -0.03                    | 1.905                    | N/A             |

(Continued)

| miRNA          | Target gene | Position of target region            | Predicted target sequence   | Site type | Context+<br>+ score | Context++<br>score<br>percentile | Weighted<br>context+++<br>score | Conserve<br>d branch<br>length | P <sub>CT</sub> |
|----------------|-------------|--------------------------------------|-----------------------------|-----------|---------------------|----------------------------------|---------------------------------|--------------------------------|-----------------|
| hsa-miR-30a-5p | CEACAM1     | Position 1455-1462 of CEACAM1 3' UTR | 5'-UCAUGCUGGUGGCAUUGUUUACA  | 8mer      | -0.03               | 28                               | -0.03                           | 2.701                          | 0.22            |
| hsa-miR-30a-5p | CEACAM1     | Position 1322-1329 of CEACAM1 3' UTR | 5'-UCAUGCUGGUGGCAUUGUUUACA  | 8mer      | -0.03               | 28                               | -0.03                           | 2.701                          | 0.22            |
| hsa-miR-30d-5p | CEACAM1     | Position 1455-1462 of CEACAM1 3' UTR | 5'-UCAUGCUGGUGGCAUUGUUUACA  | 8mer      | -0.03               | 28                               | -0.03                           | 2.701                          | 0.22            |
| hsa-miR-30d-5p | CEACAM1     | Position 1322-1329 of CEACAM1 3' UTR | 5'-UCAUGCUGGUGGCAUUGUUUACA  | 8mer      | -0.03               | 28                               | -0.03                           | 2.701                          | 0.22            |
| hsa-miR-30b-5p | CEACAM1     | Position 1455-1462 of CEACAM1 3' UTR | 5'-UCAUGCUGGUGGCAU-UGUUUACA | 8mer      | -0.03               | 27                               | -0.03                           | 2.701                          | 0.22            |
| hsa-miR-30b-5p | CEACAM1     | Position 1322-1329 of CEACAM1 3' UTR | 5'-UCAUGCUGGUGGCAU-UGUUUACA | 8mer      | -0.03               | 27                               | -0.03                           | 2.701                          | 0.22            |
| hsa-miR-30c-5p | CEACAM1     | Position 1455-1462 of CEACAM1 3' UTR | 5'-UCAUGCUGGUGGCAU-UGUUUACA | 8mer      | -0.03               | 27                               | -0.03                           | 2.701                          | 0.22            |
| hsa-miR-30c-5p | CEACAM1     | Position 1322-1329 of CEACAM1 3' UTR | 5'-UCAUGCUGGUGGCAU-UGUUUACA | 8mer      | -0.03               | 27                               | -0.03                           | 2.701                          | 0.22            |
| hsa-miR-30e-5p | CEACAM1     | Position 1455-1462 of CEACAM1 3' UTR | 5'-UCAUGCUGGUGGCAUUGUUUACA  | 8mer      | -0.03               | 26                               | -0.03                           | 2.701                          | 0.22            |
| hsa-miR-30e-5p | CEACAM1     | Position 1322-1329 of CEACAM1 3' UTR | 5'-UCAUGCUGGUGGCAUUGUUUACA  | 8mer      | -0.03               | 26                               | -0.03                           | 2.701                          | 0.22            |
| hsa-miR-494-3p | TNFRSF9     | Position 4795-4801 of TNFRSF9 3' UTR | 5'-UUCCCCCACAGGAAGAUGUUUCC  | 7mer-m8   | -0.02               | 51                               | 0                               | 2.998                          | N/A             |
| hsa-miR-494-3p | CD3G        | Position 203-209 of CD3G 3' UTR      | 5'-UAAAACAAAACUGUGUUUCAG    | 7mer-A1   | -0.02               | 33                               | -0.01                           | 3.983                          | N/A             |
| hsa-miR-340-5p | CD40LG      | Position 92-98 of CD40LG 3' UTR      | 5'-CCUGUUAACUGCCUAUUUAUAC   | 7mer-A1   | -0.01               | 51                               | -0.01                           | 4.897                          | N/A             |
| hsa-miR-129-5p | STAT1       | Position 210-216 of STAT1 3' UTR     | 5'-ACAUGACCCUAUCA-CAAAAAAC  | 7mer-A1   | -0.01               | 47                               | -0.01                           | 3.602                          | N/A             |
| hsa-miR-325-3p | FOXP3       | Position 872-878 of FOXP3 3' UTR     | 5'-CCACAGUACCGUCCCAUUAAC    | 7mer-A1   | -0.01               | 24                               | -0.01                           | 4.15                           | N/A             |
| hsa-miR-202-5p | CD28        | Position 65-71 of CD28 3' UTR        | 5'-AUAUCACUGCUCUGGAUAGGAAA  | 7mer-A1   | -0.01               | 23                               | -0.01                           | 5.672                          | < 0.1           |

Note: TargetScanHuman 7.2 ([http://www.targetscan.org/vert\\_72/](http://www.targetscan.org/vert_72/)).

**S4 Table. Cox hazard regression analysis for the cancer immunity-related miRNAs in PCNSL.**

|                                  | coef   | se(coef) | z         | p-value | HR (univariable)           | HR (multivariable)               |
|----------------------------------|--------|----------|-----------|---------|----------------------------|----------------------------------|
| (Cancer immunity-related miRNAs) |        |          |           |         |                            |                                  |
| hsa-miR-1202                     | 0.53   | 0.158    | 3.350554  | 0.001   | 1.13 (1.05-1.21, p=0.001)  | 1.70 (1.25-2.32, p=0.001)        |
| hsa-miR-101                      | -7.628 | 2.62     | -2.911913 | 0.004   | 0.18 (0.05-0.70, p=0.014)  | 0.00 (0.00-0.08, p=0.004)        |
| hsa-miR-372                      | 3.333  | 1.165    | 2.861809  | 0.004   | 0.97 (0.50-1.89, p=0.936)  | 28.02 (2.86-274.61, p=0.004)     |
| hsa-miR-609                      | -3.616 | 1.49     | -2.426783 | 0.015   | 0.64 (0.19-2.24, p=0.489)  | 0.03 (0.00-0.50, p=0.015)        |
| (Th-1)                           |        |          |           |         |                            |                                  |
| hsa-miR-577                      | 6.893  | 1.848    | 3.73044   | <0.001  | 6.06 (1.32-27.86, p=0.021) | 985.74 (26.35-36870.37, p<0.001) |
| hsa-miR-454                      | -4.513 | 1.373    | -3.287874 | 0.001   | 0.74 (0.25-2.22, p=0.597)  | 0.01 (0.00-0.16, p=0.001)        |
| hsa-miR-920                      | 1.406  | 0.583    | 2.411202  | 0.016   | 1.26 (0.52-3.09, p=0.608)  | 4.08 (1.30-12.78, p=0.016)       |
| (Th-2)                           |        |          |           |         |                            |                                  |
| hsa-miR-101                      | -1.722 | 0.699    | -2.46331  | 0.014   | 0.18 (0.05-0.70, p=0.014)  | 0.18 (0.05-0.70, p=0.014)        |
| (T-reg)                          |        |          |           |         |                            |                                  |
| hsa-miR-425                      | 0.013  | 0.004    | 3.424384  | 0.001   | 1.00 (1.00-1.01, p=0.011)  | 1.01 (1.01-1.02, p=0.001)        |
| hsa-let-7i                       | -0.02  | 0.006    | -3.299202 | 0.001   | 1.00 (0.99-1.00, p=0.390)  | 0.98 (0.97-0.99, p=0.001)        |
| hsa-miR-16                       | 0.002  | 0.001    | 3.203969  | 0.001   | 1.00 (1.00-1.00, p=0.046)  | 1.00 (1.00-1.00, p=0.001)        |
| hsa-let-7g                       | -0.033 | 0.015    | -2.261216 | 0.024   | 0.98 (0.96-1.00, p=0.023)  | 0.97 (0.94-1.00, p=0.024)        |
| (Stimulatory checkpoint)         |        |          |           |         |                            |                                  |
| hsa.miR.1202                     | 0.53   | 0.158    | 3.350554  | 0.001   | 1.13 (1.05-1.21, p=0.001)  | 1.70 (1.25-2.32, p=0.001)        |
| hsa.miR.101                      | -7.628 | 2.62     | -2.911913 | 0.004   | 0.18 (0.05-0.70, p=0.014)  | 0.00 (0.00-0.08, p=0.004)        |
| hsa.miR.372                      | 3.333  | 1.165    | 2.861809  | 0.004   | 0.97 (0.50-1.89, p=0.936)  | 28.02 (2.86-274.61, p=0.004)     |
| hsa.miR.609                      | -3.616 | 1.49     | -2.426783 | 0.015   | 0.64 (0.19-2.24, p=0.489)  | 0.03 (0.00-0.50, p=0.015)        |
| (Inhibitory checkpoint)          |        |          |           |         |                            |                                  |
| hsa.miR.1202                     | 0.53   | 0.158    | 3.350554  | 0.001   | 1.13 (1.05-1.21, p=0.001)  | 1.70 (1.25-2.32, p=0.001)        |
| hsa.miR.101                      | -7.628 | 2.62     | -2.911913 | 0.004   | 0.18 (0.05-0.70, p=0.014)  | 0.00 (0.00-0.08, p=0.004)        |
| hsa.miR.372                      | 3.333  | 1.165    | 2.861809  | 0.004   | 0.97 (0.50-1.89, p=0.936)  | 28.02 (2.86-274.61, p=0.004)     |
| hsa.miR.609                      | -3.616 | 1.49     | -2.426783 | 0.015   | 0.64 (0.19-2.24, p=0.489)  | 0.03 (0.00-0.50, p=0.015)        |

**Note:** coef; co-efficiency, se; standard error, HR; hazard ratio, z; z-value.

S5 Table. Significant miRNA candidates in cancer immunity in PCNSL.

|                 | HR <sup>1</sup> (95% CI <sup>2</sup> ) | P-value | Th-1 Status | Th-2 Status | T-reg Status | Stimulatory Checkpoint | Inhibitory Checkpoint |
|-----------------|----------------------------------------|---------|-------------|-------------|--------------|------------------------|-----------------------|
| hsa-miR-1202    | 1.13 (1.05-1.21)                       | 0.001   |             |             |              | ●                      | ●                     |
| hsa-miR-30d     | 1.01 (1.00-1.01)                       | 0.002   |             |             |              | ●                      | ●                     |
| hsa-miR-1183    | 1.71 (1.17-2.50)                       | 0.005   |             |             |              | ●                      | ●                     |
| hsa-miR-425     | 1.00 (1.00-1.01)                       | 0.011   |             |             | ●            |                        | ●                     |
| hsa-miR-554     | 0.10 (0.02-0.59)                       | 0.011   |             |             |              | ●                      | ●                     |
| hsa-miR-141     | 1.14 (1.03-1.27)                       | 0.012   | ●           |             | ●            | ●                      | ●                     |
| hsa-miR-30b     | 1.01 (1.00-1.01)                       | 0.013   |             |             |              | ●                      | ●                     |
| hsa-miR-875-3p  | 0.07 (0.01-0.58)                       | 0.013   |             |             |              | ●                      | ●                     |
| hsa-miR-101     | 0.18 (0.05-0.70)                       | 0.014   |             | ●           |              | ●                      | ●                     |
| hsa-miR-637     | 1.19 (1.03-1.37)                       | 0.015   |             |             |              |                        | ●                     |
| hsa-miR-422a    | 1.06 (1.01-1.11)                       | 0.019   | ●           | ●           |              | ●                      | ●                     |
| hsa-miR-577     | 6.06 (1.32-27.86)                      | 0.021   | ●           | ●           |              | ●                      | ●                     |
| hsa-miR-548d-3p | 0.23 (0.07-0.80)                       | 0.021   |             |             |              |                        | ●                     |
| hsa-miR-648     | 0.19 (0.05-0.79)                       | 0.022   |             |             |              | ●                      | ●                     |
| hsa-let-7g      | 0.98 (0.96-1.00)                       | 0.023   |             |             | ●            | ●                      |                       |
| hsa-miR-548b-5p | 3.54 (1.19-10.56)                      | 0.024   |             |             |              | ●                      | ●                     |
| hsa-miR-1275    | 1.01 (1.00-1.03)                       | 0.027   | ●           | ●           |              | ●                      | ●                     |
| hsa-miR-1321    | 3.06 (1.13-8.34)                       | 0.028   | ●           | ●           |              | ●                      | ●                     |
| hsa-miR-182     | 1.01 (1.00-1.01)                       | 0.029   |             |             |              |                        | ●                     |
| hsa-miR-1181    | 1.11 (1.01-1.21)                       | 0.031   |             |             |              | ●                      |                       |
| hsa-miR-135a    | 0.27 (0.08-0.92)                       | 0.036   |             | ●           |              | ●                      | ●                     |
| hsa-miR-16      | 1.00 (1.00-1.00)                       | 0.046   | ●           | ●           | ●            | ●                      | ●                     |
| hsa-miR-649     | 2.21 (1.01-4.84)                       | 0.046   |             |             |              | ●                      | ●                     |

Note: <sup>1</sup>HR; hazard ratio, <sup>2</sup>95%CI; 95% confidence interval; sorted by P-value.

S6 Table. Re-evaluated miRNAs with clinical information in PCNSL.

|                                                               | coef <sup>1</sup> | exp <sup>2</sup> (coef) | se <sup>3</sup> (coef) | z <sup>4</sup> | p-value | HR <sup>5</sup> (univariable) | HR (multivariable)         |
|---------------------------------------------------------------|-------------------|-------------------------|------------------------|----------------|---------|-------------------------------|----------------------------|
| <b>23 miRNAs in training data (n=20)</b>                      |                   |                         |                        |                |         |                               |                            |
| hsa-miR-1202                                                  | 0.148             | 1.159                   | 0.062                  | 2.367          | 0.018   | 1.13 (1.05-1.21, p=0.001)     | 1.16 (1.03-1.31)           |
| hsa-miR-101                                                   | -3.649            | 0.026                   | 1.398                  | -2.610         | 0.009   | 0.18 (0.05-0.70, p=0.014)     | 0.03 (0.00-0.40)           |
| hsa-miR-548b-5p                                               | 3.702             | 40.531                  | 1.264                  | 2.928          | 0.003   | 3.54 (1.19-10.56, p=0.024)    | 40.53 (3.40-482.79)        |
| hsa-miR-554                                                   | -3.738            | 0.024                   | 1.577                  | -2.370         | 0.018   | 0.10 (0.02-0.59, p=0.011)     | 0.02 (0.00-0.52)           |
| <b>4 miRNAs + clinical information validation data (n=39)</b> |                   |                         |                        |                |         |                               |                            |
| hsa-miR-1202                                                  | -0.004            | 0.996                   | 0.005                  | -0.840         | 0.401   | 1.00 (0.99-1.01, p=0.910)     | 1.00 (0.99-1.01, p=0.401)  |
| hsa-miR-101                                                   | -1.21             | 0.298                   | 0.652                  | -1.855         | 0.064   | 0.51 (0.26-0.99, p=0.046)     | 0.30 (0.08-1.07, p=0.064)  |
| hsa-miR-548b-5p                                               | 2.132             | 8.429                   | 0.613                  | 3.478          | 0.001   | 1.51 (0.76-3.01, p=0.244)     | 8.43 (2.54-28.01, p=0.001) |
| hsa-miR-554                                                   | -1.674            | 0.187                   | 0.69                   | -2.427         | 0.015   | 0.63 (0.32-1.26, p=0.191)     | 0.19 (0.05-0.72, p=0.015)  |
| age (age>=60, age<60)                                         |                   |                         |                        |                |         | 0.95 (0.39-2.33, p=0.914)     | -                          |
| gender (male, female)                                         |                   |                         |                        |                |         | 1.05 (0.46-2.40, p=0.915)     | -                          |
| KPS (KPS>=70, KPS<70)                                         |                   |                         |                        |                |         | 0.37 (0.15-0.92, p=0.033)     | -                          |
| LDH (LDH>=200, LDH<200)                                       |                   |                         |                        |                |         | 1.64 (0.71-3.80, p=0.248)     | -                          |
| deep seated (yes, no)                                         |                   |                         |                        |                |         | 2.34 (0.94-5.83, p=0.067)     | -                          |

Note: <sup>1</sup>coef; co-efficiency, <sup>2</sup>exp; expected value, <sup>3</sup>se; standard error, <sup>4</sup>z; z-value, <sup>5</sup>HR; hazard ratio.

S7 Table. Target candidates of the miRNA predictors for cancer immunity in PCNSL.

| Representative miRNA | Target candidates | Gene name                                                                 | Total context++ score | Th-1 Status | Th-2 Status | T-reg Status | Stimulatory Checkpoint | Inhibitory Checkpoint |
|----------------------|-------------------|---------------------------------------------------------------------------|-----------------------|-------------|-------------|--------------|------------------------|-----------------------|
| hsa-miR-101-3p.1     | IL13              | interleukin 13                                                            | -0.34                 |             | IL13        |              |                        |                       |
| hsa-miR-101-3p.1     | STAT6             | signal transducer and activator of transcription 6, interleukin-4 induced | -0.12                 |             | STAT6       |              |                        |                       |
| hsa-miR-101-3p.1     | GATA3             | GATA binding protein 3                                                    | -0.11                 |             | GATA3       |              |                        |                       |
| hsa-miR-101-5p       | CD96              | CD96 molecule                                                             | -0.22                 |             |             |              |                        | CD96                  |
| hsa-miR-101-5p       | CD40LG            | CD40 ligand                                                               | -0.19                 | CD40LG      | CD40LG      |              | CD40LG                 |                       |
| hsa-miR-101-5p       | TNFSF4            | tumor necrosis factor (ligand) superfamily, member 4                      | -0.14                 |             |             |              | TNFSF4                 |                       |
| hsa-miR-101-5p       | CD274             | CD274 molecule                                                            | -0.04                 |             |             | CD274        |                        | CD274                 |
| hsa-miR-101-5p       | IL12RB2           | interleukin 12 receptor, beta 2                                           | -0.04                 | IL12RB2     |             |              |                        |                       |
| hsa-miR-101-5p       | BTLA              | B and T lymphocyte associated                                             | -0.01                 |             |             |              |                        | BTLA                  |
| hsa-miR-1202         | TNFRSF14          | tumor necrosis factor receptor superfamily, member 14                     | -0.02                 |             |             |              | TNFRSF14               | TNFRSF14              |
| hsa-miR-1202         | CD3D              | CD3d molecule, delta (CD3-TCR complex)                                    | -0.01                 | CD3D        | CD3D        |              |                        |                       |
| hsa-miR-548a-5p      | CD163             | CD163 molecule                                                            | -0.2                  |             |             | CD163        |                        |                       |
| hsa-miR-548a-5p      | CD3D              | CD3d molecule, delta (CD3-TCR complex)                                    | -0.07                 | CD3D        | CD3D        |              |                        |                       |
| hsa-miR-548a-5p      | STAT1             | signal transducer and activator of transcription 1, 91kDa                 | -0.07                 | STAT1       |             |              |                        |                       |
| hsa-miR-548a-5p      | IL12RB2           | interleukin 12 receptor, beta 2                                           | -0.06                 | IL12RB2     |             |              |                        |                       |
| hsa-miR-548a-5p      | CD4               | CD4 molecule                                                              | -0.02                 | CD4         | CD4         | CD4          |                        |                       |
| hsa-miR-548ab        | CD226             | CD226 molecule                                                            | -0.19                 |             |             |              | CD226                  |                       |
| hsa-miR-548ab        | TGFB3             | transforming growth factor, beta 3                                        | -0.09                 |             | TGFB3       | TGFB3        |                        |                       |
| hsa-miR-548ab        | CD28              | CD28 molecule                                                             | -0.08                 | CD28        | CD28        |              | CD28                   |                       |
| hsa-miR-548ab        | ICOS              | inducible T-cell co-stimulator                                            | -0.05                 |             |             |              | ICOS                   |                       |
| hsa-miR-548ap-5p     | CD274             | CD274 molecule                                                            | -0.19                 |             |             | CD274        |                        | CD274                 |
| hsa-miR-548ap-5p     | BTLA              | B and T lymphocyte associated                                             | -0.11                 |             |             |              |                        | BTLA                  |
| hsa-miR-548bb-5p     | TNFSF18           | tumor necrosis factor (ligand) superfamily, member 18                     | -0.07                 |             |             |              | TNFSF18                |                       |
| hsa-miR-548y         | TGFB2             | transforming growth factor, beta 2                                        | -0.09                 |             |             | TGFB2        |                        |                       |
| hsa-miR-554          | LTA               | lymphotoxin alpha                                                         | -0.13                 | LTA         |             |              |                        |                       |
| hsa-miR-554          | CD3D              | CD3d molecule, delta (CD3-TCR complex)                                    | -0.12                 | CD3D        | CD3D        |              |                        |                       |
| hsa-miR-554          | CD28              | CD28 molecule                                                             | -0.08                 | CD28        | CD28        |              | CD28                   |                       |
| hsa-miR-554          | PVR               | poliovirus receptor                                                       | -0.08                 |             |             |              | PVR                    | PVR                   |
| hsa-miR-554          | CD4               | CD4 molecule                                                              | -0.07                 | CD4         | CD4         | CD4          |                        |                       |

Note: TargetScanHuman 7.1/7.2 ([http://www.targetscan.org/vert\\_72/](http://www.targetscan.org/vert_72/)); sorted by Representative miRNA.



S7 Table. Target candidates of the miRNA predictors for cancer immunity in PCNSL.

| Representative miRNA | Target candidates | Gene name                                                                 | Total context++ score | Th-1 Status | Th-2 Status | T-reg Status | Stimulatory Checkpoint | Inhibitory Checkpoint |
|----------------------|-------------------|---------------------------------------------------------------------------|-----------------------|-------------|-------------|--------------|------------------------|-----------------------|
| hsa-miR-101-3p.1     | IL13              | interleukin 13                                                            | -0.34                 |             | IL13        |              |                        |                       |
| hsa-miR-101-3p.1     | STAT6             | signal transducer and activator of transcription 6, interleukin-4 induced | -0.12                 |             | STAT6       |              |                        |                       |
| hsa-miR-101-3p.1     | GATA3             | GATA binding protein 3                                                    | -0.11                 |             | GATA3       |              |                        |                       |
| hsa-miR-101-5p       | CD96              | CD96 molecule                                                             | -0.22                 |             |             |              |                        | CD96                  |
| hsa-miR-101-5p       | CD40LG            | CD40 ligand                                                               | -0.19                 | CD40LG      | CD40LG      |              | CD40LG                 |                       |
| hsa-miR-101-5p       | TNFSF4            | tumor necrosis factor (ligand) superfamily, member 4                      | -0.14                 |             |             |              | TNFSF4                 |                       |
| hsa-miR-101-5p       | CD274             | CD274 molecule                                                            | -0.04                 |             |             | CD274        |                        | CD274                 |
| hsa-miR-101-5p       | IL12RB2           | interleukin 12 receptor, beta 2                                           | -0.04                 | IL12RB2     |             |              |                        |                       |
| hsa-miR-101-5p       | BTLA              | B and T lymphocyte associated                                             | -0.01                 |             |             |              |                        | BTLA                  |
| hsa-miR-1202         | TNFRSF14          | tumor necrosis factor receptor superfamily, member 14                     | -0.02                 |             |             |              | TNFRSF14               | TNFRSF14              |
| hsa-miR-1202         | CD3D              | CD3d molecule, delta (CD3-TCR complex)                                    | -0.01                 | CD3D        | CD3D        |              |                        |                       |
| hsa-miR-548a-5p      | CD163             | CD163 molecule                                                            | -0.2                  |             |             | CD163        |                        |                       |
| hsa-miR-548a-5p      | CD3D              | CD3d molecule, delta (CD3-TCR complex)                                    | -0.07                 | CD3D        | CD3D        |              |                        |                       |
| hsa-miR-548a-5p      | STAT1             | signal transducer and activator of transcription 1, 91kDa                 | -0.07                 | STAT1       |             |              |                        |                       |
| hsa-miR-548a-5p      | IL12RB2           | interleukin 12 receptor, beta 2                                           | -0.06                 | IL12RB2     |             |              |                        |                       |
| hsa-miR-548a-5p      | CD4               | CD4 molecule                                                              | -0.02                 | CD4         | CD4         | CD4          |                        |                       |
| hsa-miR-548ab        | CD226             | CD226 molecule                                                            | -0.19                 |             |             |              | CD226                  |                       |
| hsa-miR-548ab        | TGFB3             | transforming growth factor, beta 3                                        | -0.09                 |             | TGFB3       | TGFB3        |                        |                       |
| hsa-miR-548ab        | CD28              | CD28 molecule                                                             | -0.08                 | CD28        | CD28        |              | CD28                   |                       |
| hsa-miR-548ab        | ICOS              | inducible T-cell co-stimulator                                            | -0.05                 |             |             |              | ICOS                   |                       |
| hsa-miR-548ap-5p     | CD274             | CD274 molecule                                                            | -0.19                 |             |             | CD274        |                        | CD274                 |
| hsa-miR-548ap-5p     | BTLA              | B and T lymphocyte associated                                             | -0.11                 |             |             |              |                        | BTLA                  |
| hsa-miR-548bb-5p     | TNFSF18           | tumor necrosis factor (ligand) superfamily, member 18                     | -0.07                 |             |             |              | TNFSF18                |                       |
| hsa-miR-548y         | TGFB2             | transforming growth factor, beta 2                                        | -0.09                 |             |             | TGFB2        |                        |                       |
| hsa-miR-554          | LTA               | lymphotoxin alpha                                                         | -0.13                 | LTA         |             |              |                        |                       |
| hsa-miR-554          | CD3D              | CD3d molecule, delta (CD3-TCR complex)                                    | -0.12                 | CD3D        | CD3D        |              |                        |                       |
| hsa-miR-554          | CD28              | CD28 molecule                                                             | -0.08                 | CD28        | CD28        |              | CD28                   |                       |
| hsa-miR-554          | PVR               | poliovirus receptor                                                       | -0.08                 |             |             |              | PVR                    | PVR                   |
| hsa-miR-554          | CD4               | CD4 molecule                                                              | -0.07                 | CD4         | CD4         | CD4          |                        |                       |

Note: TargetScanHuman 7.1/7.2 ([http://www.targetscan.org/vert\\_72/](http://www.targetscan.org/vert_72/)); sorted by Representative miRNA.

**S8 Table. Characterization of the target candidates of the miRNA predictors for cancer immunity in PCNSL.**

| Category         | Term                                                       | Count | %    | P-Value |
|------------------|------------------------------------------------------------|-------|------|---------|
| GOTERM_MF_DIRECT | protein binding                                            | 495   | 53.7 | 3.5E-09 |
| UP_KEYWORDS      | Acetylation                                                | 212   | 23   | 2.0E-07 |
| UP_KEYWORDS      | Alternative splicing                                       | 539   | 58.5 | 3.4E-06 |
| UP_KEYWORDS      | Phosphoprotein                                             | 430   | 46.6 | 1.3E-05 |
| INTERPRO         | Small GTPase superfamily, Ras type                         | 10    | 1.1  | 5.0E-05 |
| UP_KEYWORDS      | Nucleus                                                    | 285   | 30.9 | 6.9E-05 |
| UP_KEYWORDS      | Ubl conjugation                                            | 110   | 11.9 | 7.3E-05 |
| KEGG_PATHWAY     | Transcriptional misregulation in cancer                    | 21    | 2.3  | 1.0E-04 |
| INTERPRO         | Ubiquitin-conjugating enzyme, active site                  | 8     | 0.9  | 1.2E-04 |
| UP_KEYWORDS      | Prenylation                                                | 20    | 2.2  | 1.8E-04 |
| INTERPRO         | Small GTPase superfamily                                   | 18    | 2    | 2.0E-04 |
| INTERPRO         | Small GTP-binding protein domain                           | 20    | 2.2  | 2.2E-04 |
| UP_KEYWORDS      | Repressor                                                  | 46    | 5    | 3.5E-04 |
| INTERPRO         | Ubiquitin-conjugating enzyme, E2                           | 9     | 1    | 5.3E-04 |
| GOTERM_MF_DIRECT | GDP binding                                                | 10    | 1.1  | 8.7E-04 |
| INTERPRO         | Ubiquitin-conjugating enzyme/RWD-like                      | 10    | 1.1  | 8.9E-04 |
| UP_KEYWORDS      | Cytoplasm                                                  | 255   | 27.7 | 1.1E-03 |
| INTERPRO         | Cobalamin (vitamin B12) biosynthesis CobW-like, C-terminal | 4     | 0.4  | 1.7E-03 |
| INTERPRO         | CobW/HypB/UreG domain                                      | 4     | 0.4  | 1.7E-03 |
| UP_KEYWORDS      | Isopeptide bond                                            | 72    | 7.8  | 2.2E-03 |
| UP_KEYWORDS      | Lipoprotein                                                | 57    | 6.2  | 2.4E-03 |
| BIOCARTA         | Signaling of Hepatocyte Growth Factor Receptor             | 8     | 0.9  | 4.3E-03 |
| KEGG_PATHWAY     | Pathways in cancer                                         | 31    | 3.4  | 5.2E-03 |
| INTERPRO         | Sas10/Utp3/C1D                                             | 3     | 0.3  | 6.0E-03 |
| GOTERM_MF_DIRECT | calcium channel regulator activity                         | 6     | 0.7  | 7.8E-03 |
| KEGG_PATHWAY     | MAPK signaling pathway                                     | 22    | 2.4  | 8.2E-03 |
| KEGG_PATHWAY     | Alcoholism                                                 | 17    | 1.8  | 8.7E-03 |
| KEGG_PATHWAY     | Ras signaling pathway                                      | 20    | 2.2  | 9.5E-03 |
| GOTERM_MF_DIRECT | ubiquitin conjugating enzyme activity                      | 6     | 0.7  | 1.1E-02 |
| KEGG_PATHWAY     | Protein processing in endoplasmic reticulum                | 16    | 1.7  | 1.3E-02 |
| GOTERM_MF_DIRECT | signal transducer activity                                 | 18    | 2    | 1.7E-02 |
| KEGG_PATHWAY     | Prolactin signaling pathway                                | 9     | 1    | 1.7E-02 |
| KEGG_PATHWAY     | Chronic myeloid leukemia                                   | 9     | 1    | 1.9E-02 |
| GOTERM_MF_DIRECT | cyclin-dependent protein serine/threonine kinase activity  | 6     | 0.7  | 2.1E-02 |
| INTERPRO         | P-loop containing nucleoside triphosphate hydrolase        | 54    | 5.9  | 2.3E-02 |
| KEGG_PATHWAY     | FoxO signaling pathway                                     | 13    | 1.4  | 2.3E-02 |
| KEGG_PATHWAY     | Neurotrophin signaling pathway                             | 12    | 1.3  | 2.5E-02 |
| GOTERM_MF_DIRECT | RNA binding                                                | 37    | 4    | 2.8E-02 |
| GOTERM_MF_DIRECT | GTPase activity                                            | 19    | 2.1  | 2.9E-02 |
| BIOCARTA         | Erk1/Erk2 Mapk Signaling pathway                           | 6     | 0.7  | 3.0E-02 |
| GOTERM_MF_DIRECT | single-stranded DNA binding                                | 10    | 1.1  | 3.1E-02 |
| GOTERM_MF_DIRECT | ubiquitin protein ligase binding                           | 22    | 2.4  | 3.1E-02 |
| BIOCARTA         | VEGF, Hypoxia, and Angiogenesis                            | 6     | 0.7  | 3.4E-02 |

**Note: DAVID 6.8 (<https://david.ncifcrf.gov/>); top 10 in each category, P<0.05, sorted by P-value.**

**S9 Table. Related diseases of the target candidates of the miRNA predictors for cancer immunity in PCNSL.**

| Category    | Term                                                                                                  | Count | %   | P-Value  |
|-------------|-------------------------------------------------------------------------------------------------------|-------|-----|----------|
| GAD_DISEASE | Acquired Immunodeficiency Syndrome Disease Progression                                                | 61    | 6.6 | 7.50E-03 |
| GAD_DISEASE | Blood Pressure Determination                                                                          | 13    | 1.4 | 1.10E-02 |
| GAD_DISEASE | Fibrinogen                                                                                            | 15    | 1.6 | 1.30E-02 |
| GAD_DISEASE | Alcoholism                                                                                            | 37    | 4   | 1.30E-02 |
| GAD_DISEASE | Aorta                                                                                                 | 8     | 0.9 | 1.90E-02 |
| GAD_DISEASE | Blood Coagulation Factors                                                                             | 8     | 0.9 | 1.90E-02 |
| GAD_DISEASE | Glucose                                                                                               | 20    | 2.2 | 2.40E-02 |
| GAD_DISEASE | Body Fat Distribution                                                                                 | 11    | 1.2 | 2.70E-02 |
| GAD_DISEASE | Abnormalities, Multiple Heart Defects, Congenital LEOPARD Syndrome Noonan Syndrome Skin Abnormalities | 3     | 0.3 | 3.10E-02 |
| GAD_DISEASE | Hippocampus                                                                                           | 6     | 0.7 | 3.10E-02 |
| GAD_DISEASE | Subcutaneous Fat                                                                                      | 4     | 0.4 | 3.30E-02 |
| GAD_DISEASE | Glioma Noonan Syndrome Turner's phenotype, karyotype normal                                           | 3     | 0.3 | 4.10E-02 |

**Note:** DAVID 6.8 (<https://david.ncifcrf.gov/>); P<0.05, sorted by P-value.

**S8 Table. Characterization of the target candidates of the miRNA predictors for cancer immunity in PCNSL.**

| Category         | Term                                                       | Count | %    | P-Value |
|------------------|------------------------------------------------------------|-------|------|---------|
| GOTERM_MF_DIRECT | protein binding                                            | 495   | 53.7 | 3.5E-09 |
| UP_KEYWORDS      | Acetylation                                                | 212   | 23   | 2.0E-07 |
| UP_KEYWORDS      | Alternative splicing                                       | 539   | 58.5 | 3.4E-06 |
| UP_KEYWORDS      | Phosphoprotein                                             | 430   | 46.6 | 1.3E-05 |
| INTERPRO         | Small GTPase superfamily, Ras type                         | 10    | 1.1  | 5.0E-05 |
| UP_KEYWORDS      | Nucleus                                                    | 285   | 30.9 | 6.9E-05 |
| UP_KEYWORDS      | Ubl conjugation                                            | 110   | 11.9 | 7.3E-05 |
| KEGG_PATHWAY     | Transcriptional misregulation in cancer                    | 21    | 2.3  | 1.0E-04 |
| INTERPRO         | Ubiquitin-conjugating enzyme, active site                  | 8     | 0.9  | 1.2E-04 |
| UP_KEYWORDS      | Prenylation                                                | 20    | 2.2  | 1.8E-04 |
| INTERPRO         | Small GTPase superfamily                                   | 18    | 2    | 2.0E-04 |
| INTERPRO         | Small GTP-binding protein domain                           | 20    | 2.2  | 2.2E-04 |
| UP_KEYWORDS      | Repressor                                                  | 46    | 5    | 3.5E-04 |
| INTERPRO         | Ubiquitin-conjugating enzyme, E2                           | 9     | 1    | 5.3E-04 |
| GOTERM_MF_DIRECT | GDP binding                                                | 10    | 1.1  | 8.7E-04 |
| INTERPRO         | Ubiquitin-conjugating enzyme/RWD-like                      | 10    | 1.1  | 8.9E-04 |
| UP_KEYWORDS      | Cytoplasm                                                  | 255   | 27.7 | 1.1E-03 |
| INTERPRO         | Cobalamin (vitamin B12) biosynthesis CobW-like, C-terminal | 4     | 0.4  | 1.7E-03 |
| INTERPRO         | CobW/HypB/UreG domain                                      | 4     | 0.4  | 1.7E-03 |
| UP_KEYWORDS      | Isopeptide bond                                            | 72    | 7.8  | 2.2E-03 |
| UP_KEYWORDS      | Lipoprotein                                                | 57    | 6.2  | 2.4E-03 |
| BIOCARTA         | Signaling of Hepatocyte Growth Factor Receptor             | 8     | 0.9  | 4.3E-03 |
| KEGG_PATHWAY     | Pathways in cancer                                         | 31    | 3.4  | 5.2E-03 |
| INTERPRO         | Sas10/Utp3/C1D                                             | 3     | 0.3  | 6.0E-03 |
| GOTERM_MF_DIRECT | calcium channel regulator activity                         | 6     | 0.7  | 7.8E-03 |
| KEGG_PATHWAY     | MAPK signaling pathway                                     | 22    | 2.4  | 8.2E-03 |
| KEGG_PATHWAY     | Alcoholism                                                 | 17    | 1.8  | 8.7E-03 |
| KEGG_PATHWAY     | Ras signaling pathway                                      | 20    | 2.2  | 9.5E-03 |
| GOTERM_MF_DIRECT | ubiquitin conjugating enzyme activity                      | 6     | 0.7  | 1.1E-02 |
| KEGG_PATHWAY     | Protein processing in endoplasmic reticulum                | 16    | 1.7  | 1.3E-02 |
| GOTERM_MF_DIRECT | signal transducer activity                                 | 18    | 2    | 1.7E-02 |
| KEGG_PATHWAY     | Prolactin signaling pathway                                | 9     | 1    | 1.7E-02 |
| KEGG_PATHWAY     | Chronic myeloid leukemia                                   | 9     | 1    | 1.9E-02 |
| GOTERM_MF_DIRECT | cyclin-dependent protein serine/threonine kinase activity  | 6     | 0.7  | 2.1E-02 |
| INTERPRO         | P-loop containing nucleoside triphosphate hydrolase        | 54    | 5.9  | 2.3E-02 |
| KEGG_PATHWAY     | FoxO signaling pathway                                     | 13    | 1.4  | 2.3E-02 |
| KEGG_PATHWAY     | Neurotrophin signaling pathway                             | 12    | 1.3  | 2.5E-02 |
| GOTERM_MF_DIRECT | RNA binding                                                | 37    | 4    | 2.8E-02 |
| GOTERM_MF_DIRECT | GTPase activity                                            | 19    | 2.1  | 2.9E-02 |
| BIOCARTA         | Erk1/Erk2 Mapk Signaling pathway                           | 6     | 0.7  | 3.0E-02 |
| GOTERM_MF_DIRECT | single-stranded DNA binding                                | 10    | 1.1  | 3.1E-02 |
| GOTERM_MF_DIRECT | ubiquitin protein ligase binding                           | 22    | 2.4  | 3.1E-02 |
| BIOCARTA         | VEGF, Hypoxia, and Angiogenesis                            | 6     | 0.7  | 3.4E-02 |

**Note:** DAVID 6.8 (<https://david.ncifcrf.gov/>); top 10 in each category, P<0.05, sorted by P-value.



**S9 Table. Related diseases of the target candidates of the miRNA predictors for cancer immunity in PCNSL.**

| Category    | Term                                                                                                  | Count | %   | P-Value  |
|-------------|-------------------------------------------------------------------------------------------------------|-------|-----|----------|
| GAD_DISEASE | Acquired Immunodeficiency Syndrome Disease Progression                                                | 61    | 6.6 | 7.50E-03 |
| GAD_DISEASE | Blood Pressure Determination                                                                          | 13    | 1.4 | 1.10E-02 |
| GAD_DISEASE | Fibrinogen                                                                                            | 15    | 1.6 | 1.30E-02 |
| GAD_DISEASE | Alcoholism                                                                                            | 37    | 4   | 1.30E-02 |
| GAD_DISEASE | Aorta                                                                                                 | 8     | 0.9 | 1.90E-02 |
| GAD_DISEASE | Blood Coagulation Factors                                                                             | 8     | 0.9 | 1.90E-02 |
| GAD_DISEASE | Glucose                                                                                               | 20    | 2.2 | 2.40E-02 |
| GAD_DISEASE | Body Fat Distribution                                                                                 | 11    | 1.2 | 2.70E-02 |
| GAD_DISEASE | Abnormalities, Multiple Heart Defects, Congenital LEOPARD Syndrome Noonan Syndrome Skin Abnormalities | 3     | 0.3 | 3.10E-02 |
| GAD_DISEASE | Hippocampus                                                                                           | 6     | 0.7 | 3.10E-02 |
| GAD_DISEASE | Subcutaneous Fat                                                                                      | 4     | 0.4 | 3.30E-02 |
| GAD_DISEASE | Glioma Noonan Syndrome Turner's phenotype, karyotype normal                                           | 3     | 0.3 | 4.10E-02 |

**Note:** DAVID 6.8 (<https://david.ncifcrf.gov/>); P<0.05, sorted by P-value.
