# Supplementary material for: miR-101, miR-548b, miR-554, and miR-1202 are reliable prognosis predictors of the miRNAs associated with cancer immunity in primary central nervous system lymphoma
Source: PubMed Central journal article supplement (PMC7043771; doi:10.1371/journal.pone.0229577), 2020-02-26
Supplement: pone.0229577.s008.pdf [file pone.0229577.s008.pdf]

**S4 Table. Cox hazard regression analysis for the cancer immunity-related miRNAs in PCNSL.**

|                                  | coef   | se(coef) | z         | p-value | HR (univariable)           | HR (multivariable)               |
|----------------------------------|--------|----------|-----------|---------|----------------------------|----------------------------------|
| (Cancer immunity-related miRNAs) |        |          |           |         |                            |                                  |
| hsa-miR-1202                     | 0.53   | 0.158    | 3.350554  | 0.001   | 1.13 (1.05-1.21, p=0.001)  | 1.70 (1.25-2.32, p=0.001)        |
| hsa-miR-101                      | -7.628 | 2.62     | -2.911913 | 0.004   | 0.18 (0.05-0.70, p=0.014)  | 0.00 (0.00-0.08, p=0.004)        |
| hsa-miR-372                      | 3.333  | 1.165    | 2.861809  | 0.004   | 0.97 (0.50-1.89, p=0.936)  | 28.02 (2.86-274.61, p=0.004)     |
| hsa-miR-609                      | -3.616 | 1.49     | -2.426783 | 0.015   | 0.64 (0.19-2.24, p=0.489)  | 0.03 (0.00-0.50, p=0.015)        |
| (Th-1)                           |        |          |           |         |                            |                                  |
| hsa-miR-577                      | 6.893  | 1.848    | 3.73044   | <0.001  | 6.06 (1.32-27.86, p=0.021) | 985.74 (26.35-36870.37, p<0.001) |
| hsa-miR-454                      | -4.513 | 1.373    | -3.287874 | 0.001   | 0.74 (0.25-2.22, p=0.597)  | 0.01 (0.00-0.16, p=0.001)        |
| hsa-miR-920                      | 1.406  | 0.583    | 2.411202  | 0.016   | 1.26 (0.52-3.09, p=0.608)  | 4.08 (1.30-12.78, p=0.016)       |
| (Th-2)                           |        |          |           |         |                            |                                  |
| hsa-miR-101                      | -1.722 | 0.699    | -2.46331  | 0.014   | 0.18 (0.05-0.70, p=0.014)  | 0.18 (0.05-0.70, p=0.014)        |
| (T-reg)                          |        |          |           |         |                            |                                  |
| hsa-miR-425                      | 0.013  | 0.004    | 3.424384  | 0.001   | 1.00 (1.00-1.01, p=0.011)  | 1.01 (1.01-1.02, p=0.001)        |
| hsa-let-7i                       | -0.02  | 0.006    | -3.299202 | 0.001   | 1.00 (0.99-1.00, p=0.390)  | 0.98 (0.97-0.99, p=0.001)        |
| hsa-miR-16                       | 0.002  | 0.001    | 3.203969  | 0.001   | 1.00 (1.00-1.00, p=0.046)  | 1.00 (1.00-1.00, p=0.001)        |
| hsa-let-7g                       | -0.033 | 0.015    | -2.261216 | 0.024   | 0.98 (0.96-1.00, p=0.023)  | 0.97 (0.94-1.00, p=0.024)        |
| (Stimulatory checkpoint)         |        |          |           |         |                            |                                  |
| hsa.miR.1202                     | 0.53   | 0.158    | 3.350554  | 0.001   | 1.13 (1.05-1.21, p=0.001)  | 1.70 (1.25-2.32, p=0.001)        |
| hsa.miR.101                      | -7.628 | 2.62     | -2.911913 | 0.004   | 0.18 (0.05-0.70, p=0.014)  | 0.00 (0.00-0.08, p=0.004)        |
| hsa.miR.372                      | 3.333  | 1.165    | 2.861809  | 0.004   | 0.97 (0.50-1.89, p=0.936)  | 28.02 (2.86-274.61, p=0.004)     |
| hsa.miR.609                      | -3.616 | 1.49     | -2.426783 | 0.015   | 0.64 (0.19-2.24, p=0.489)  | 0.03 (0.00-0.50, p=0.015)        |
| (Inhibitory checkpoint)          |        |          |           |         |                            |                                  |
| hsa.miR.1202                     | 0.53   | 0.158    | 3.350554  | 0.001   | 1.13 (1.05-1.21, p=0.001)  | 1.70 (1.25-2.32, p=0.001)        |
| hsa.miR.101                      | -7.628 | 2.62     | -2.911913 | 0.004   | 0.18 (0.05-0.70, p=0.014)  | 0.00 (0.00-0.08, p=0.004)        |
| hsa.miR.372                      | 3.333  | 1.165    | 2.861809  | 0.004   | 0.97 (0.50-1.89, p=0.936)  | 28.02 (2.86-274.61, p=0.004)     |
| hsa.miR.609                      | -3.616 | 1.49     | -2.426783 | 0.015   | 0.64 (0.19-2.24, p=0.489)  | 0.03 (0.00-0.50, p=0.015)        |

**Note:** coef; co-efficiency, se; standard error, HR; hazard ratio, z; z-value.
