# Supplementary material for: miR-101, miR-548b, miR-554, and miR-1202 are reliable prognosis predictors of the miRNAs associated with cancer immunity in primary central nervous system lymphoma
Source: PubMed Central journal article supplement (PMC7043771; doi:10.1371/journal.pone.0229577), 2020-02-26
Supplement: pone.0229577.s009.pdf [file pone.0229577.s009.pdf]

S5 Table. Significant miRNA candidates in cancer immunity in PCNSL.

|                 | HR <sup>1</sup> (95% CI <sup>2</sup> ) | P-value | Th-1 Status | Th-2 Status | T-reg Status | Stimulatory Checkpoint | Inhibitory Checkpoint |
|-----------------|----------------------------------------|---------|-------------|-------------|--------------|------------------------|-----------------------|
| hsa-miR-1202    | 1.13 (1.05-1.21)                       | 0.001   |             |             |              | ●                      | ●                     |
| hsa-miR-30d     | 1.01 (1.00-1.01)                       | 0.002   |             |             |              | ●                      | ●                     |
| hsa-miR-1183    | 1.71 (1.17-2.50)                       | 0.005   |             |             |              | ●                      | ●                     |
| hsa-miR-425     | 1.00 (1.00-1.01)                       | 0.011   |             |             | ●            |                        | ●                     |
| hsa-miR-554     | 0.10 (0.02-0.59)                       | 0.011   |             |             |              | ●                      | ●                     |
| hsa-miR-141     | 1.14 (1.03-1.27)                       | 0.012   | ●           |             | ●            | ●                      | ●                     |
| hsa-miR-30b     | 1.01 (1.00-1.01)                       | 0.013   |             |             |              | ●                      | ●                     |
| hsa-miR-875-3p  | 0.07 (0.01-0.58)                       | 0.013   |             |             |              | ●                      | ●                     |
| hsa-miR-101     | 0.18 (0.05-0.70)                       | 0.014   |             | ●           |              | ●                      | ●                     |
| hsa-miR-637     | 1.19 (1.03-1.37)                       | 0.015   |             |             |              |                        | ●                     |
| hsa-miR-422a    | 1.06 (1.01-1.11)                       | 0.019   | ●           | ●           |              | ●                      | ●                     |
| hsa-miR-577     | 6.06 (1.32-27.86)                      | 0.021   | ●           | ●           |              | ●                      | ●                     |
| hsa-miR-548d-3p | 0.23 (0.07-0.80)                       | 0.021   |             |             |              |                        | ●                     |
| hsa-miR-648     | 0.19 (0.05-0.79)                       | 0.022   |             |             |              | ●                      | ●                     |
| hsa-let-7g      | 0.98 (0.96-1.00)                       | 0.023   |             |             | ●            | ●                      |                       |
| hsa-miR-548b-5p | 3.54 (1.19-10.56)                      | 0.024   |             |             |              | ●                      | ●                     |
| hsa-miR-1275    | 1.01 (1.00-1.03)                       | 0.027   | ●           | ●           |              | ●                      | ●                     |
| hsa-miR-1321    | 3.06 (1.13-8.34)                       | 0.028   | ●           | ●           |              | ●                      | ●                     |
| hsa-miR-182     | 1.01 (1.00-1.01)                       | 0.029   |             |             |              |                        | ●                     |
| hsa-miR-1181    | 1.11 (1.01-1.21)                       | 0.031   |             |             |              | ●                      |                       |
| hsa-miR-135a    | 0.27 (0.08-0.92)                       | 0.036   |             | ●           |              | ●                      | ●                     |
| hsa-miR-16      | 1.00 (1.00-1.00)                       | 0.046   | ●           | ●           | ●            | ●                      | ●                     |
| hsa-miR-649     | 2.21 (1.01-4.84)                       | 0.046   |             |             |              | ●                      | ●                     |

Note: <sup>1</sup>HR; hazard ratio, <sup>2</sup>95%CI; 95% confidence interval; sorted by P-value.
