# Supplementary material for: miR-101, miR-548b, miR-554, and miR-1202 are reliable prognosis predictors of the miRNAs associated with cancer immunity in primary central nervous system lymphoma
Source: PubMed Central journal article supplement (PMC7043771; doi:10.1371/journal.pone.0229577), 2020-02-26
Supplement: pone.0229577.s010.pdf [file pone.0229577.s010.pdf]

S6 Table. Re-evaluated miRNAs with clinical information in PCNSL.

|                                                               | coef <sup>1</sup> | exp <sup>2</sup> (coef) | se <sup>3</sup> (coef) | z <sup>4</sup> | p-value | HR <sup>5</sup> (univariable) | HR (multivariable)         |
|---------------------------------------------------------------|-------------------|-------------------------|------------------------|----------------|---------|-------------------------------|----------------------------|
| <b>23 miRNAs in training data (n=20)</b>                      |                   |                         |                        |                |         |                               |                            |
| hsa-miR-1202                                                  | 0.148             | 1.159                   | 0.062                  | 2.367          | 0.018   | 1.13 (1.05-1.21, p=0.001)     | 1.16 (1.03-1.31)           |
| hsa-miR-101                                                   | -3.649            | 0.026                   | 1.398                  | -2.610         | 0.009   | 0.18 (0.05-0.70, p=0.014)     | 0.03 (0.00-0.40)           |
| hsa-miR-548b-5p                                               | 3.702             | 40.531                  | 1.264                  | 2.928          | 0.003   | 3.54 (1.19-10.56, p=0.024)    | 40.53 (3.40-482.79)        |
| hsa-miR-554                                                   | -3.738            | 0.024                   | 1.577                  | -2.370         | 0.018   | 0.10 (0.02-0.59, p=0.011)     | 0.02 (0.00-0.52)           |
| <b>4 miRNAs + clinical information validation data (n=39)</b> |                   |                         |                        |                |         |                               |                            |
| hsa-miR-1202                                                  | -0.004            | 0.996                   | 0.005                  | -0.840         | 0.401   | 1.00 (0.99-1.01, p=0.910)     | 1.00 (0.99-1.01, p=0.401)  |
| hsa-miR-101                                                   | -1.21             | 0.298                   | 0.652                  | -1.855         | 0.064   | 0.51 (0.26-0.99, p=0.046)     | 0.30 (0.08-1.07, p=0.064)  |
| hsa-miR-548b-5p                                               | 2.132             | 8.429                   | 0.613                  | 3.478          | 0.001   | 1.51 (0.76-3.01, p=0.244)     | 8.43 (2.54-28.01, p=0.001) |
| hsa-miR-554                                                   | -1.674            | 0.187                   | 0.69                   | -2.427         | 0.015   | 0.63 (0.32-1.26, p=0.191)     | 0.19 (0.05-0.72, p=0.015)  |
| age (age>=60, age<60)                                         |                   |                         |                        |                |         | 0.95 (0.39-2.33, p=0.914)     | -                          |
| gender (male, female)                                         |                   |                         |                        |                |         | 1.05 (0.46-2.40, p=0.915)     | -                          |
| KPS (KPS>=70, KPS<70)                                         |                   |                         |                        |                |         | 0.37 (0.15-0.92, p=0.033)     | -                          |
| LDH (LDH>=200, LDH<200)                                       |                   |                         |                        |                |         | 1.64 (0.71-3.80, p=0.248)     | -                          |
| deep seated (yes, no)                                         |                   |                         |                        |                |         | 2.34 (0.94-5.83, p=0.067)     | -                          |

Note: <sup>1</sup>coef; co-efficiency, <sup>2</sup>exp; expected value, <sup>3</sup>se; standard error, <sup>4</sup>z; z-value, <sup>5</sup>HR; hazard ratio.
