# Supplementary material for: miR-101, miR-548b, miR-554, and miR-1202 are reliable prognosis predictors of the miRNAs associated with cancer immunity in primary central nervous system lymphoma
Source: PubMed Central journal article supplement (PMC7043771; doi:10.1371/journal.pone.0229577), 2020-02-26
Supplement: pone.0229577.s011.pdf [file pone.0229577.s011.pdf]

S7 Table. Target candidates of the miRNA predictors for cancer immunity in PCNSL.

| Representative miRNA | Target candidates | Gene name                                                                 | Total context++ score | Th-1 Status | Th-2 Status | T-reg Status | Stimulatory Checkpoint | Inhibitory Checkpoint |
|----------------------|-------------------|---------------------------------------------------------------------------|-----------------------|-------------|-------------|--------------|------------------------|-----------------------|
| hsa-miR-101-3p.1     | IL13              | interleukin 13                                                            | -0.34                 |             | IL13        |              |                        |                       |
| hsa-miR-101-3p.1     | STAT6             | signal transducer and activator of transcription 6, interleukin-4 induced | -0.12                 |             | STAT6       |              |                        |                       |
| hsa-miR-101-3p.1     | GATA3             | GATA binding protein 3                                                    | -0.11                 |             | GATA3       |              |                        |                       |
| hsa-miR-101-5p       | CD96              | CD96 molecule                                                             | -0.22                 |             |             |              |                        | CD96                  |
| hsa-miR-101-5p       | CD40LG            | CD40 ligand                                                               | -0.19                 | CD40LG      | CD40LG      |              | CD40LG                 |                       |
| hsa-miR-101-5p       | TNFSF4            | tumor necrosis factor (ligand) superfamily, member 4                      | -0.14                 |             |             |              | TNFSF4                 |                       |
| hsa-miR-101-5p       | CD274             | CD274 molecule                                                            | -0.04                 |             |             | CD274        |                        | CD274                 |
| hsa-miR-101-5p       | IL12RB2           | interleukin 12 receptor, beta 2                                           | -0.04                 | IL12RB2     |             |              |                        |                       |
| hsa-miR-101-5p       | BTLA              | B and T lymphocyte associated                                             | -0.01                 |             |             |              |                        | BTLA                  |
| hsa-miR-1202         | TNFRSF14          | tumor necrosis factor receptor superfamily, member 14                     | -0.02                 |             |             |              | TNFRSF14               | TNFRSF14              |
| hsa-miR-1202         | CD3D              | CD3d molecule, delta (CD3-TCR complex)                                    | -0.01                 | CD3D        | CD3D        |              |                        |                       |
| hsa-miR-548a-5p      | CD163             | CD163 molecule                                                            | -0.2                  |             |             | CD163        |                        |                       |
| hsa-miR-548a-5p      | CD3D              | CD3d molecule, delta (CD3-TCR complex)                                    | -0.07                 | CD3D        | CD3D        |              |                        |                       |
| hsa-miR-548a-5p      | STAT1             | signal transducer and activator of transcription 1, 91kDa                 | -0.07                 | STAT1       |             |              |                        |                       |
| hsa-miR-548a-5p      | IL12RB2           | interleukin 12 receptor, beta 2                                           | -0.06                 | IL12RB2     |             |              |                        |                       |
| hsa-miR-548a-5p      | CD4               | CD4 molecule                                                              | -0.02                 | CD4         | CD4         | CD4          |                        |                       |
| hsa-miR-548ab        | CD226             | CD226 molecule                                                            | -0.19                 |             |             |              | CD226                  |                       |
| hsa-miR-548ab        | TGFB3             | transforming growth factor, beta 3                                        | -0.09                 |             | TGFB3       | TGFB3        |                        |                       |
| hsa-miR-548ab        | CD28              | CD28 molecule                                                             | -0.08                 | CD28        | CD28        |              | CD28                   |                       |
| hsa-miR-548ab        | ICOS              | inducible T-cell co-stimulator                                            | -0.05                 |             |             |              | ICOS                   |                       |
| hsa-miR-548ap-5p     | CD274             | CD274 molecule                                                            | -0.19                 |             |             | CD274        |                        | CD274                 |
| hsa-miR-548ap-5p     | BTLA              | B and T lymphocyte associated                                             | -0.11                 |             |             |              |                        | BTLA                  |
| hsa-miR-548bb-5p     | TNFSF18           | tumor necrosis factor (ligand) superfamily, member 18                     | -0.07                 |             |             |              | TNFSF18                |                       |
| hsa-miR-548y         | TGFB2             | transforming growth factor, beta 2                                        | -0.09                 |             |             | TGFB2        |                        |                       |
| hsa-miR-554          | LTA               | lymphotoxin alpha                                                         | -0.13                 | LTA         |             |              |                        |                       |
| hsa-miR-554          | CD3D              | CD3d molecule, delta (CD3-TCR complex)                                    | -0.12                 | CD3D        | CD3D        |              |                        |                       |
| hsa-miR-554          | CD28              | CD28 molecule                                                             | -0.08                 | CD28        | CD28        |              | CD28                   |                       |
| hsa-miR-554          | PVR               | poliovirus receptor                                                       | -0.08                 |             |             |              | PVR                    | PVR                   |
| hsa-miR-554          | CD4               | CD4 molecule                                                              | -0.07                 | CD4         | CD4         | CD4          |                        |                       |

Note: TargetScanHuman 7.1/7.2 ([http://www.targetscan.org/vert\\_72/](http://www.targetscan.org/vert_72/)); sorted by Representative miRNA.
