# Supplementary material for: miR-101, miR-548b, miR-554, and miR-1202 are reliable prognosis predictors of the miRNAs associated with cancer immunity in primary central nervous system lymphoma
Source: PubMed Central journal article supplement (PMC7043771; doi:10.1371/journal.pone.0229577), 2020-02-26
Supplement: pone.0229577.s012.pdf [file pone.0229577.s012.pdf]

**S8 Table. Characterization of the target candidates of the miRNA predictors for cancer immunity in PCNSL.**

| Category         | Term                                                       | Count | %    | P-Value |
|------------------|------------------------------------------------------------|-------|------|---------|
| GOTERM_MF_DIRECT | protein binding                                            | 495   | 53.7 | 3.5E-09 |
| UP_KEYWORDS      | Acetylation                                                | 212   | 23   | 2.0E-07 |
| UP_KEYWORDS      | Alternative splicing                                       | 539   | 58.5 | 3.4E-06 |
| UP_KEYWORDS      | Phosphoprotein                                             | 430   | 46.6 | 1.3E-05 |
| INTERPRO         | Small GTPase superfamily, Ras type                         | 10    | 1.1  | 5.0E-05 |
| UP_KEYWORDS      | Nucleus                                                    | 285   | 30.9 | 6.9E-05 |
| UP_KEYWORDS      | Ubl conjugation                                            | 110   | 11.9 | 7.3E-05 |
| KEGG_PATHWAY     | Transcriptional misregulation in cancer                    | 21    | 2.3  | 1.0E-04 |
| INTERPRO         | Ubiquitin-conjugating enzyme, active site                  | 8     | 0.9  | 1.2E-04 |
| UP_KEYWORDS      | Prenylation                                                | 20    | 2.2  | 1.8E-04 |
| INTERPRO         | Small GTPase superfamily                                   | 18    | 2    | 2.0E-04 |
| INTERPRO         | Small GTP-binding protein domain                           | 20    | 2.2  | 2.2E-04 |
| UP_KEYWORDS      | Repressor                                                  | 46    | 5    | 3.5E-04 |
| INTERPRO         | Ubiquitin-conjugating enzyme, E2                           | 9     | 1    | 5.3E-04 |
| GOTERM_MF_DIRECT | GDP binding                                                | 10    | 1.1  | 8.7E-04 |
| INTERPRO         | Ubiquitin-conjugating enzyme/RWD-like                      | 10    | 1.1  | 8.9E-04 |
| UP_KEYWORDS      | Cytoplasm                                                  | 255   | 27.7 | 1.1E-03 |
| INTERPRO         | Cobalamin (vitamin B12) biosynthesis CobW-like, C-terminal | 4     | 0.4  | 1.7E-03 |
| INTERPRO         | CobW/HypB/UreG domain                                      | 4     | 0.4  | 1.7E-03 |
| UP_KEYWORDS      | Isopeptide bond                                            | 72    | 7.8  | 2.2E-03 |
| UP_KEYWORDS      | Lipoprotein                                                | 57    | 6.2  | 2.4E-03 |
| BIOCARTA         | Signaling of Hepatocyte Growth Factor Receptor             | 8     | 0.9  | 4.3E-03 |
| KEGG_PATHWAY     | Pathways in cancer                                         | 31    | 3.4  | 5.2E-03 |
| INTERPRO         | Sas10/Utp3/C1D                                             | 3     | 0.3  | 6.0E-03 |
| GOTERM_MF_DIRECT | calcium channel regulator activity                         | 6     | 0.7  | 7.8E-03 |
| KEGG_PATHWAY     | MAPK signaling pathway                                     | 22    | 2.4  | 8.2E-03 |
| KEGG_PATHWAY     | Alcoholism                                                 | 17    | 1.8  | 8.7E-03 |
| KEGG_PATHWAY     | Ras signaling pathway                                      | 20    | 2.2  | 9.5E-03 |
| GOTERM_MF_DIRECT | ubiquitin conjugating enzyme activity                      | 6     | 0.7  | 1.1E-02 |
| KEGG_PATHWAY     | Protein processing in endoplasmic reticulum                | 16    | 1.7  | 1.3E-02 |
| GOTERM_MF_DIRECT | signal transducer activity                                 | 18    | 2    | 1.7E-02 |
| KEGG_PATHWAY     | Prolactin signaling pathway                                | 9     | 1    | 1.7E-02 |
| KEGG_PATHWAY     | Chronic myeloid leukemia                                   | 9     | 1    | 1.9E-02 |
| GOTERM_MF_DIRECT | cyclin-dependent protein serine/threonine kinase activity  | 6     | 0.7  | 2.1E-02 |
| INTERPRO         | P-loop containing nucleoside triphosphate hydrolase        | 54    | 5.9  | 2.3E-02 |
| KEGG_PATHWAY     | FoxO signaling pathway                                     | 13    | 1.4  | 2.3E-02 |
| KEGG_PATHWAY     | Neurotrophin signaling pathway                             | 12    | 1.3  | 2.5E-02 |
| GOTERM_MF_DIRECT | RNA binding                                                | 37    | 4    | 2.8E-02 |
| GOTERM_MF_DIRECT | GTPase activity                                            | 19    | 2.1  | 2.9E-02 |
| BIOCARTA         | Erk1/Erk2 Mapk Signaling pathway                           | 6     | 0.7  | 3.0E-02 |
| GOTERM_MF_DIRECT | single-stranded DNA binding                                | 10    | 1.1  | 3.1E-02 |
| GOTERM_MF_DIRECT | ubiquitin protein ligase binding                           | 22    | 2.4  | 3.1E-02 |
| BIOCARTA         | VEGF, Hypoxia, and Angiogenesis                            | 6     | 0.7  | 3.4E-02 |

**Note: DAVID 6.8 (<https://david.ncifcrf.gov/>); top 10 in each category, P<0.05, sorted by P-value.**
