# Supplementary material for: miR-101, miR-548b, miR-554, and miR-1202 are reliable prognosis predictors of the miRNAs associated with cancer immunity in primary central nervous system lymphoma
Source: PubMed Central journal article supplement (PMC7043771; doi:10.1371/journal.pone.0229577), 2020-02-26
Supplement: pone.0229577.s013.pdf [file pone.0229577.s013.pdf]

**S9 Table. Related diseases of the target candidates of the miRNA predictors for cancer immunity in PCNSL.**

| Category    | Term                                                                                                  | Count | %   | P-Value  |
|-------------|-------------------------------------------------------------------------------------------------------|-------|-----|----------|
| GAD_DISEASE | Acquired Immunodeficiency Syndrome Disease Progression                                                | 61    | 6.6 | 7.50E-03 |
| GAD_DISEASE | Blood Pressure Determination                                                                          | 13    | 1.4 | 1.10E-02 |
| GAD_DISEASE | Fibrinogen                                                                                            | 15    | 1.6 | 1.30E-02 |
| GAD_DISEASE | Alcoholism                                                                                            | 37    | 4   | 1.30E-02 |
| GAD_DISEASE | Aorta                                                                                                 | 8     | 0.9 | 1.90E-02 |
| GAD_DISEASE | Blood Coagulation Factors                                                                             | 8     | 0.9 | 1.90E-02 |
| GAD_DISEASE | Glucose                                                                                               | 20    | 2.2 | 2.40E-02 |
| GAD_DISEASE | Body Fat Distribution                                                                                 | 11    | 1.2 | 2.70E-02 |
| GAD_DISEASE | Abnormalities, Multiple Heart Defects, Congenital LEOPARD Syndrome Noonan Syndrome Skin Abnormalities | 3     | 0.3 | 3.10E-02 |
| GAD_DISEASE | Hippocampus                                                                                           | 6     | 0.7 | 3.10E-02 |
| GAD_DISEASE | Subcutaneous Fat                                                                                      | 4     | 0.4 | 3.30E-02 |
| GAD_DISEASE | Glioma Noonan Syndrome Turner's phenotype, karyotype normal                                           | 3     | 0.3 | 4.10E-02 |

**Note:** DAVID 6.8 (<https://david.ncifcrf.gov/>); P<0.05, sorted by P-value.
